# Supplementary material for: Asymmetric Synthesis of Methoxylated Ether Lipids: Total Synthesis of Polyunsaturated C18:3 Omega-3 and Omega-6 MEL Triene Derivatives
Source: MDPI journal article supplement (doi:10.3390/molecules29010223), 2023-12-31
Supplement: s1 [file s1]

## Supporting Information

# Asymmetric synthesis of methoxylated ether lipids: Total synthesis of polyunsaturated C18:3 omega-3 and omega-6 MEL triene derivatives

Svanur Sigurjónsson and Gudmundur G. Haraldsson\*

Science Institute, Chemistry Department, University of Iceland, Dunhaga 3, 107 Reykjavik, Iceland

## Table of contents

|                       |                 |
|-----------------------|-----------------|
| <b>NMR Spectra</b>    | <i>S2 – S34</i> |
| Compound <b>12</b>    | <i>S2</i>       |
| Compound <b>13</b>    | <i>S5</i>       |
| Compound MEL <b>5</b> | <i>S8</i>       |
| Compound <b>14</b>    | <i>S11</i>      |
| Compound <b>15</b>    | <i>S13</i>      |
| Compound <b>16</b>    | <i>S14</i>      |
| Compound <b>17</b>    | <i>S17</i>      |
| Compound <b>18</b>    | <i>S20</i>      |
| Compound <b>19</b>    | <i>S22</i>      |
| Compound <b>20</b>    | <i>S24</i>      |
| Compound <b>21</b>    | <i>S26</i>      |
| Compound <b>22</b>    | <i>S29</i>      |
| Compound MEL <b>6</b> | <i>S32</i>      |
| <b>MS/MS Spectra</b>  | <i>S35</i>      |
| Figure <i>S1</i>      | <i>S35</i>      |

$^1\text{H}$  NMR (400 MHz,  $\text{CDCl}_3$ ) of compound **12**

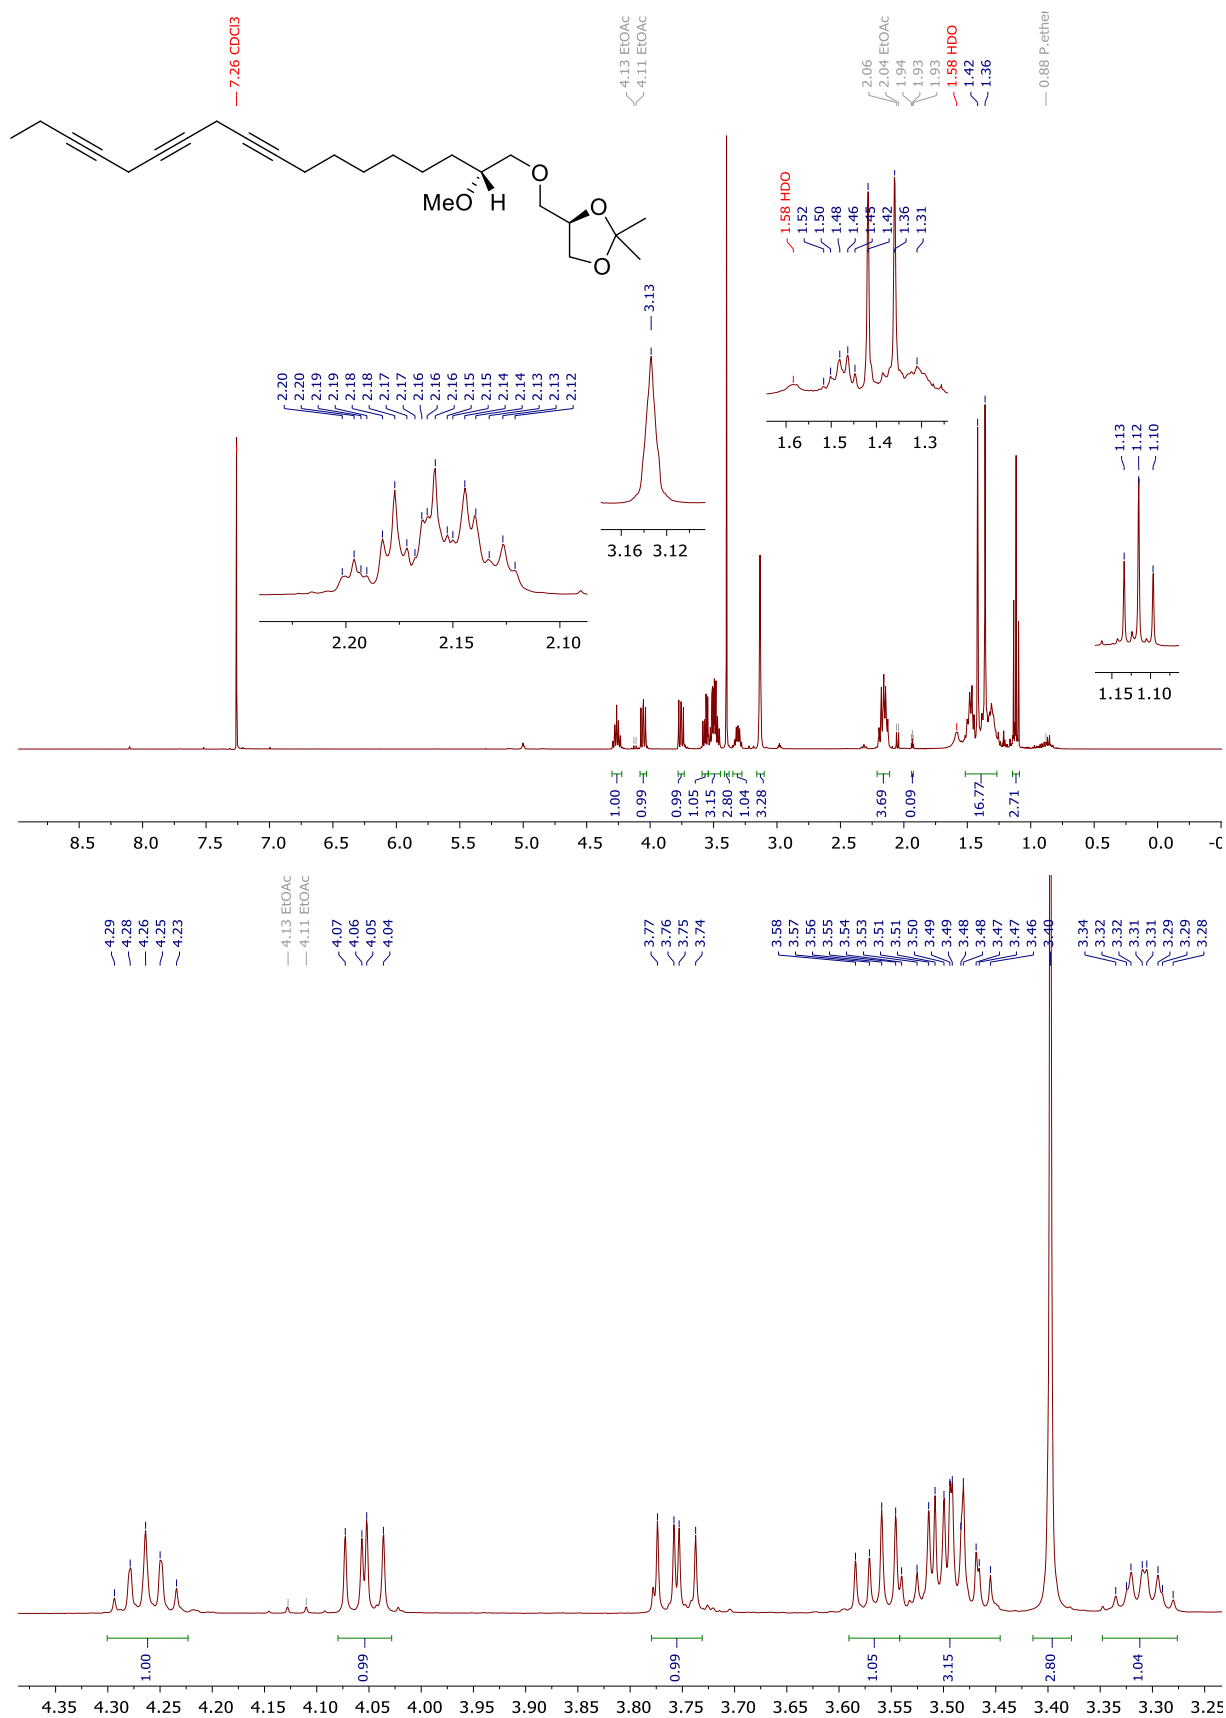

$^{13}\text{C}\{\text{H}\}$  NMR (101 MHz,  $\text{CDCl}_3$ ) of compound **12**

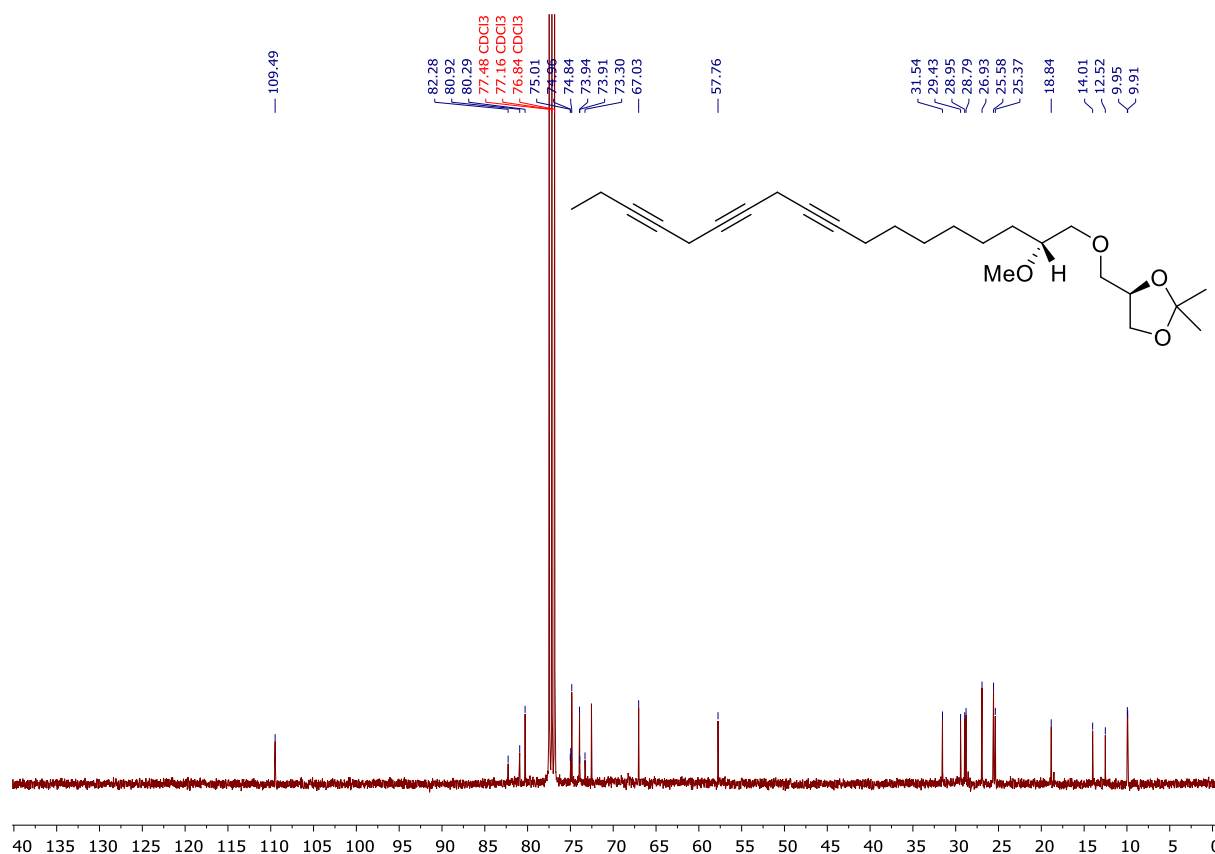

$^1\text{H}$ - $^1\text{H}$  COSY spectrum of compound **12**

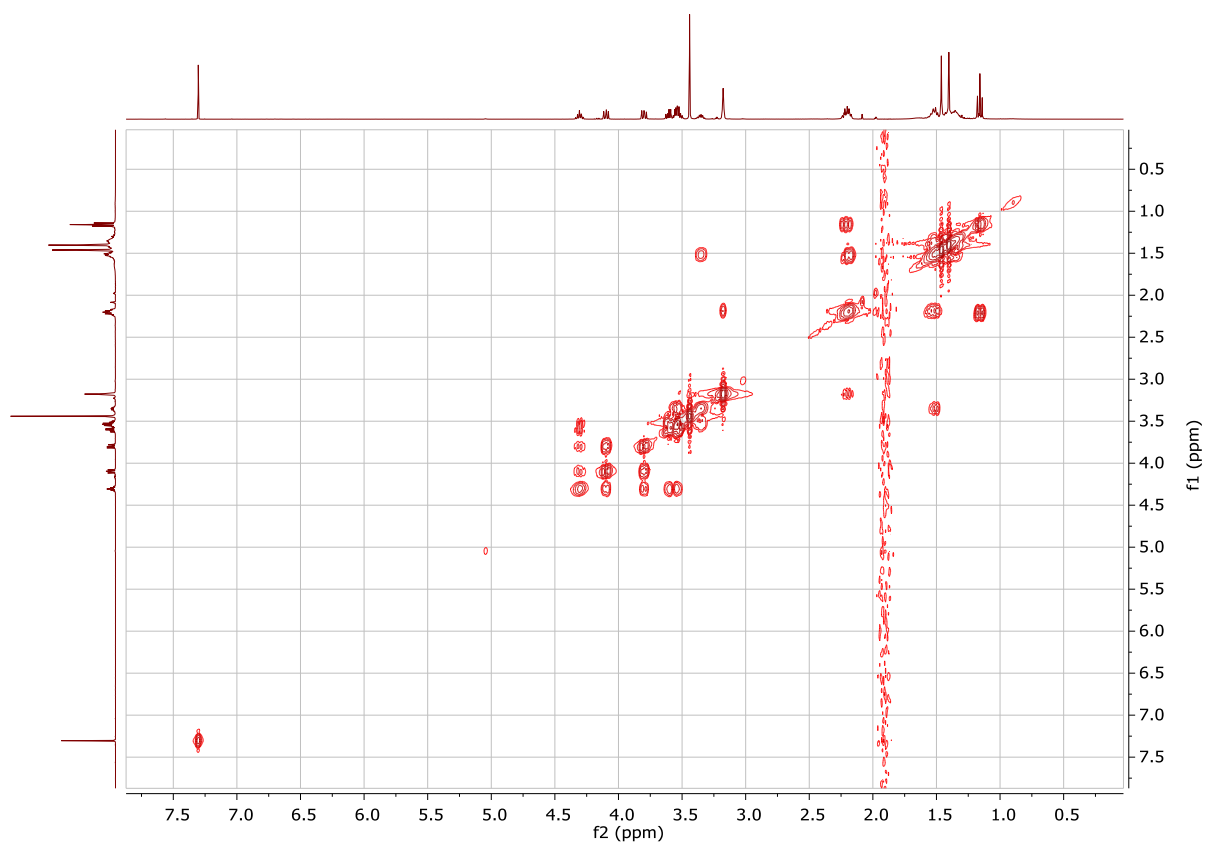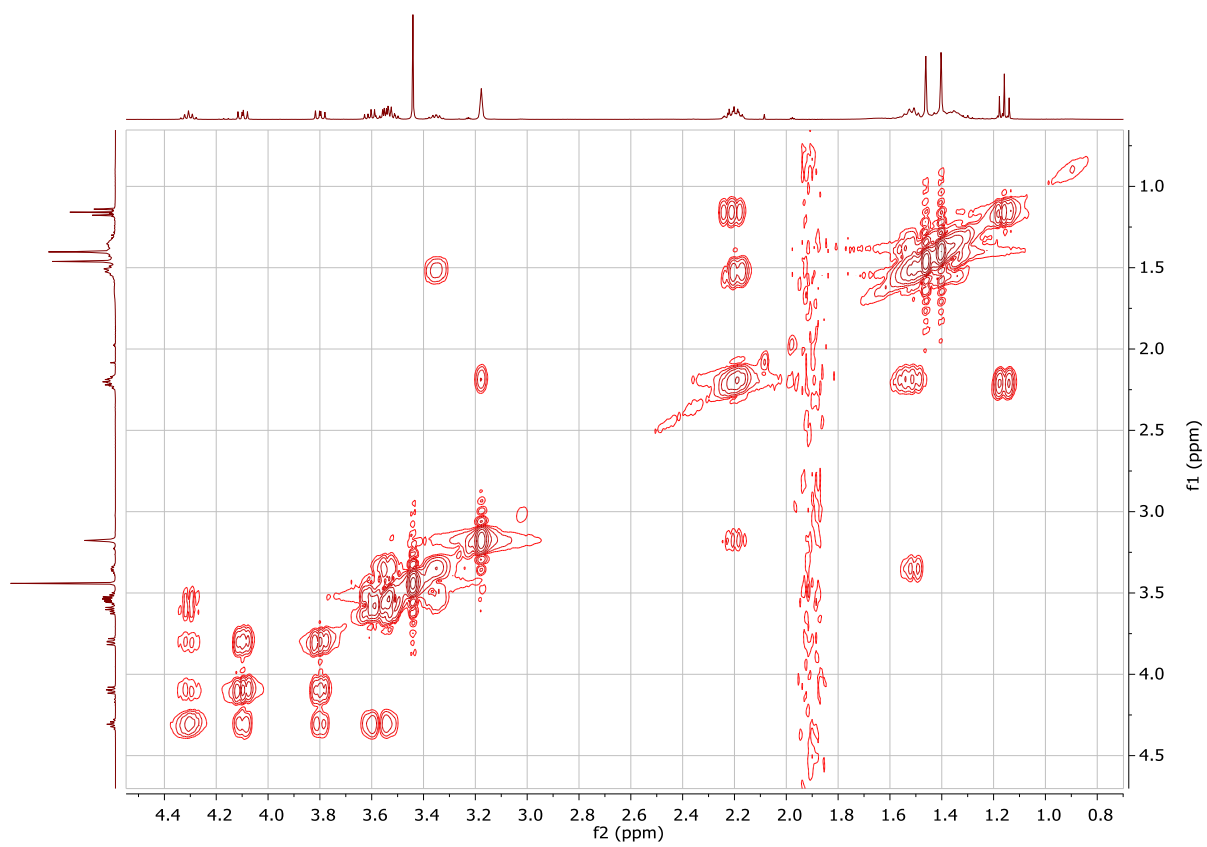

<sup>1</sup>H NMR (400 MHz, CDCl<sub>3</sub>) of compound **13**

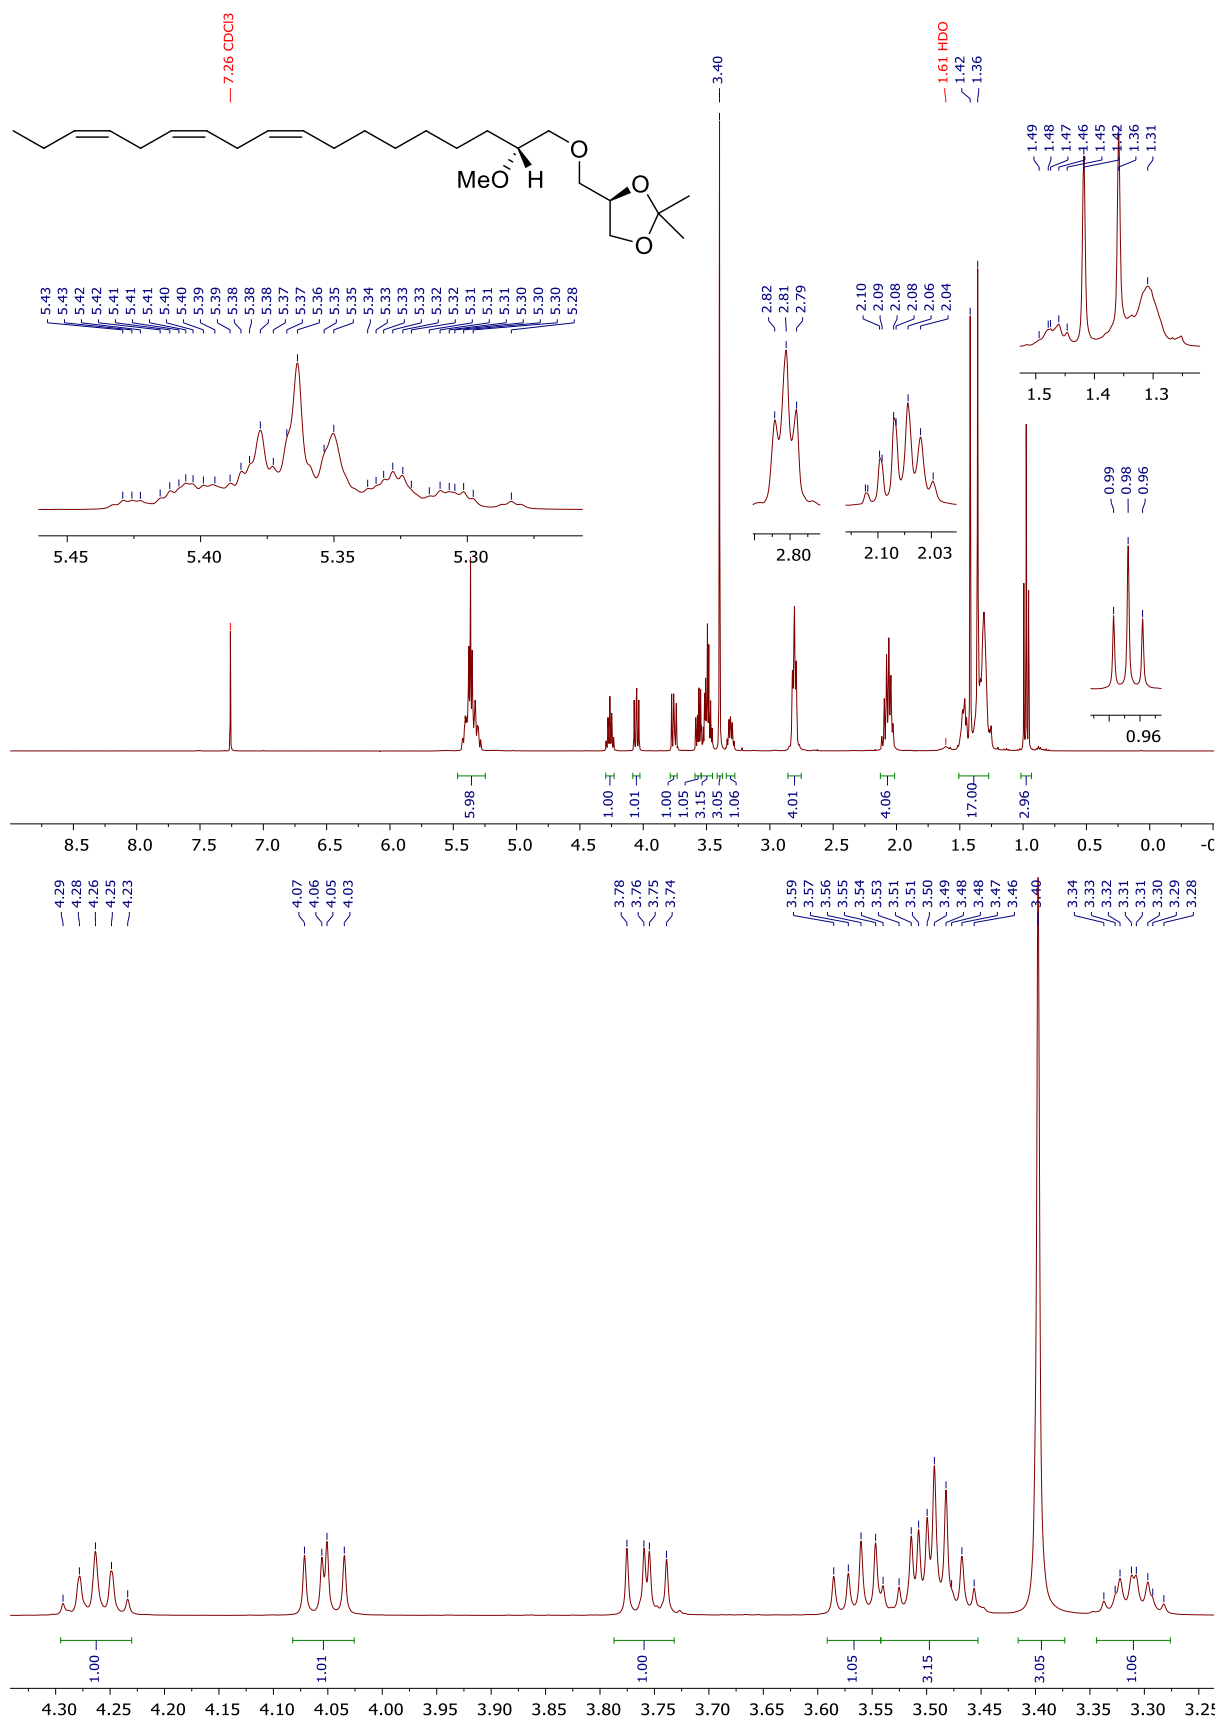

$^{13}\text{C}\{\text{H}\}$  NMR (101 MHz,  $\text{CDCl}_3$ ) of compound **13**

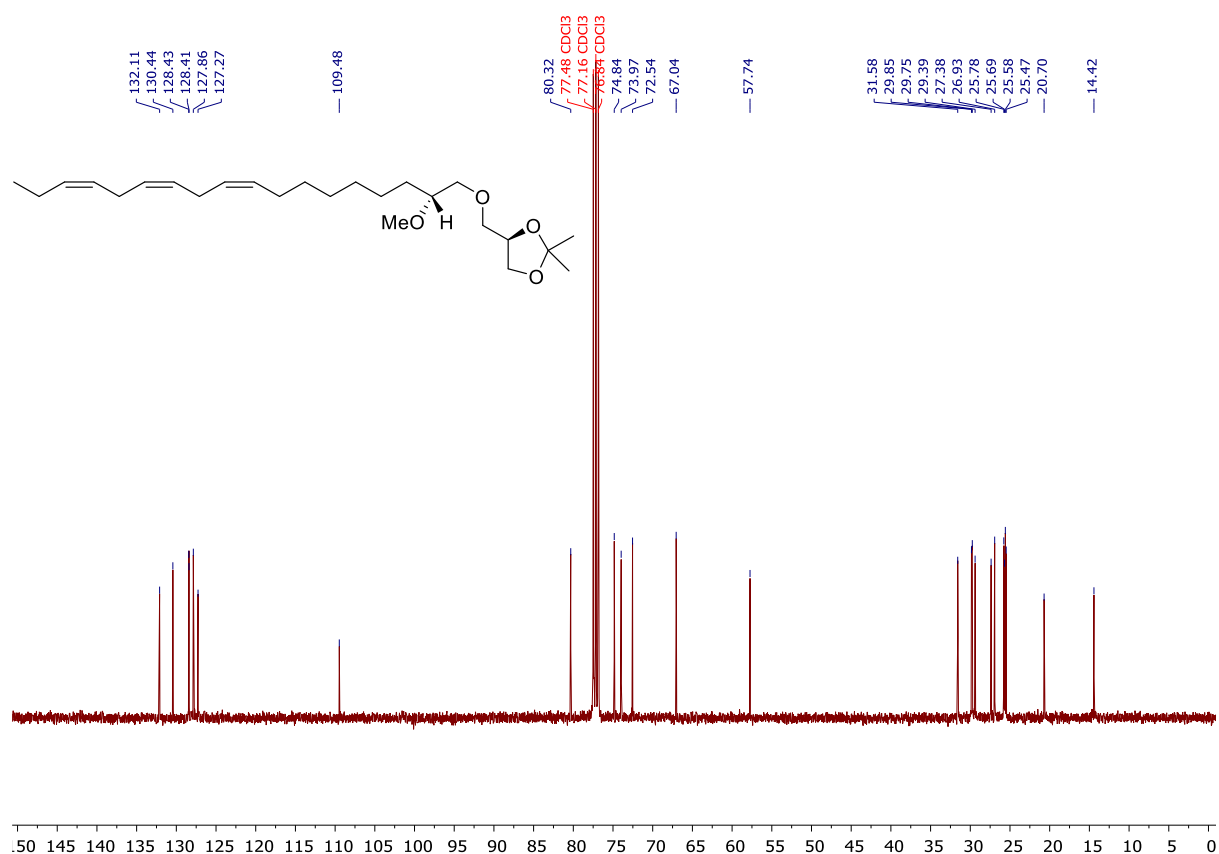

$^1\text{H}$ - $^1\text{H}$  COSY spectrum of compound **13**

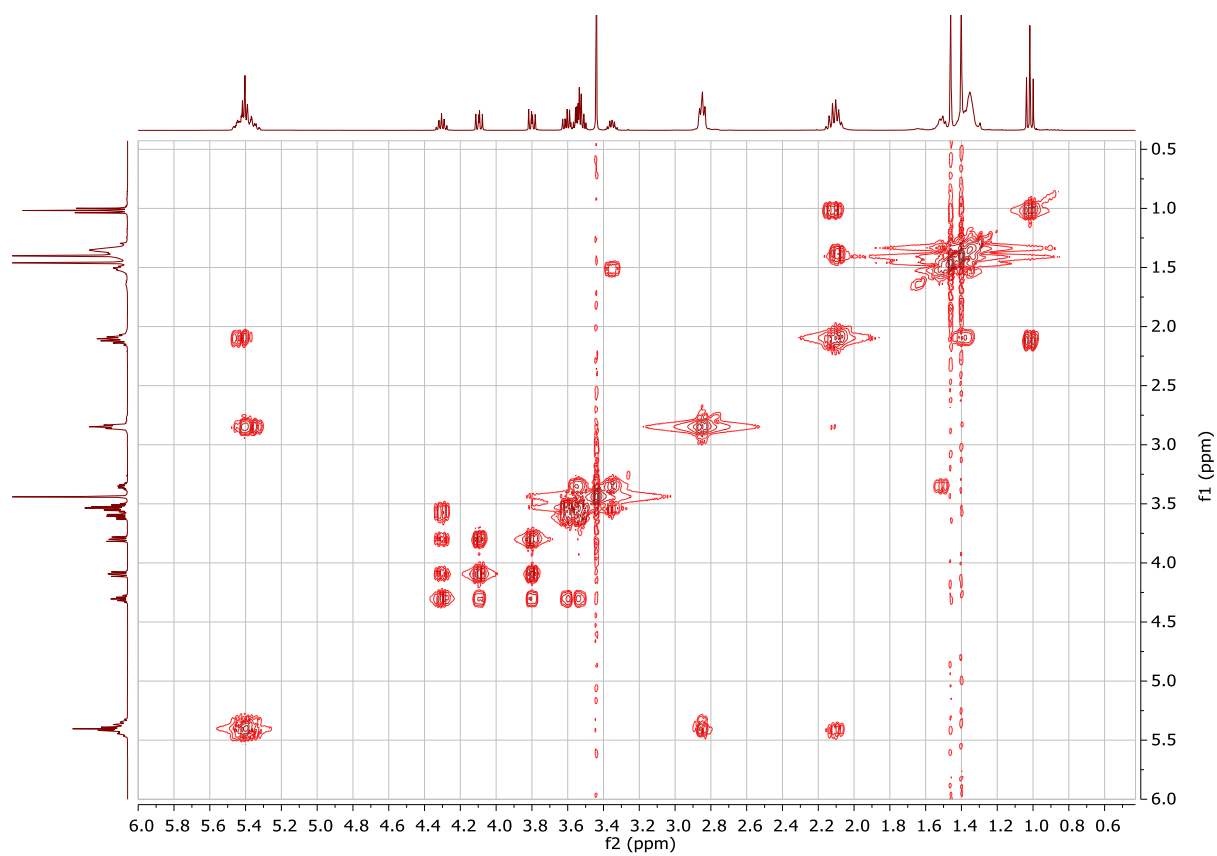

$^{13}\text{C}$ - $^1\text{H}$  HSQC spectrum of compound **13**

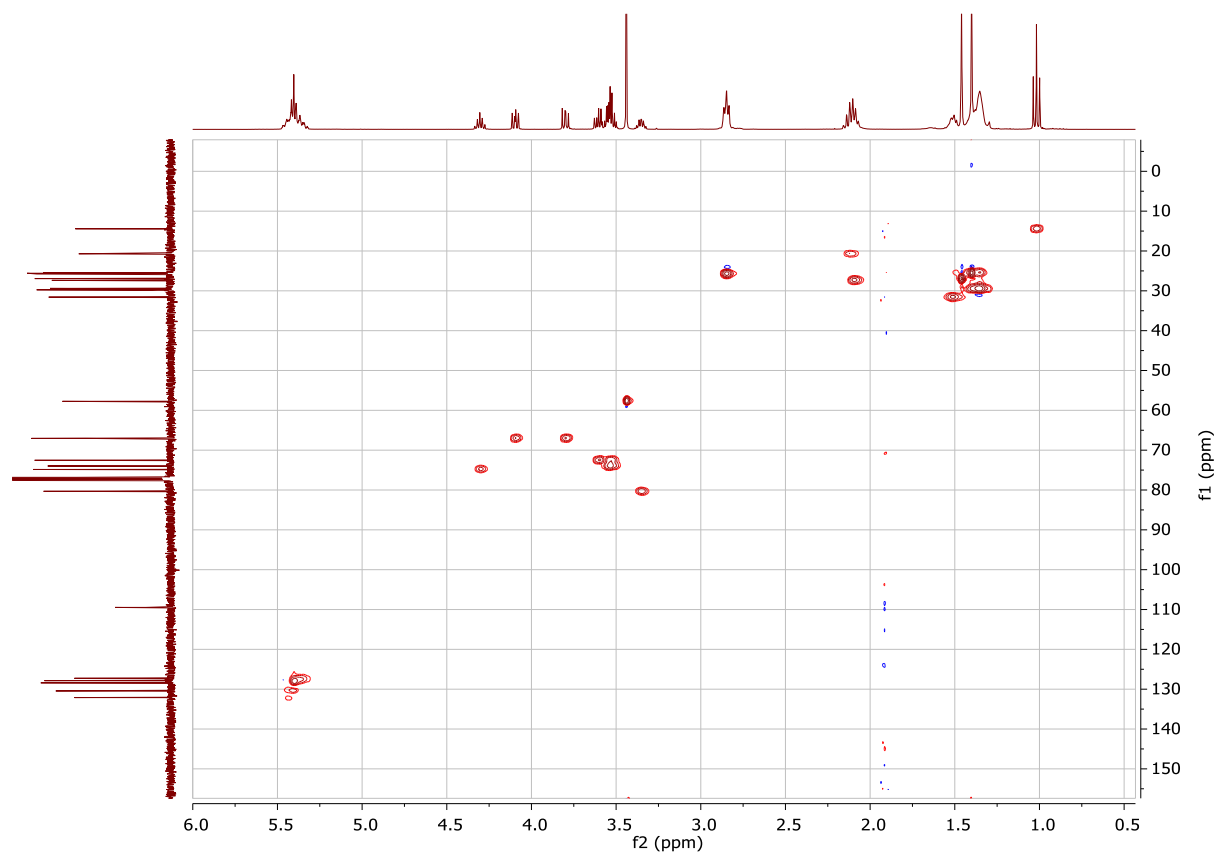

Chemical structure of (S)-1,2-dihydroxy-1-methoxy-10-undecene is shown. The structure is a long chain with a terminal double bond, a methoxy group, and two hydroxyl groups. The stereochemistry at the chiral center is (S).

<sup>1</sup>H NMR spectrum (CDCl<sub>3</sub>) showing peaks from 0 to 6 ppm. The spectrum is characterized by a large peak at 3.40 ppm (integration 2.97) and a smaller peak at 3.35 ppm (integration 1.07). Other peaks are visible in the 1.3-2.1 ppm range (integration 1.01) and the 3.8-4.0 ppm range (integration 1.00). A list of peak chemical shifts is provided on the right side of the spectrum.

Peak chemical shifts (ppm): 3.89, 3.88, 3.87, 3.86, 3.85, 3.84, 3.73, 3.72, 3.70, 3.69, 3.66, 3.65, 3.63, 3.62, 3.60, 3.58, 3.57, 3.56, 3.55, 3.54, 3.52, 3.50, 3.48, 3.47, 3.46, 3.40, 3.35, 3.34, 3.33, 3.32, 3.31, 3.30, 3.29, 2.82, 2.80, 2.79, 2.11, 2.10, 2.08, 2.06, 2.05, 2.03, 1.52, 1.51, 1.50, 1.49, 1.47, 1.45, 1.43, 1.31, 0.99, 0.97, 0.95.

Integration values: 1.00, 1.00, 2.03, 2.17, 1.01, 2.97, 1.07.

Chemical structure of (E)-12-((S)-2,3-dihydroxypropyl)undec-5-en-1-yl methyl ether is shown above the spectrum. The structure is a long-chain molecule with a terminal methyl ether group, a double bond, and a terminal dihydroxypropyl group.

The  $^{13}\text{C}$  NMR spectrum (CDCl<sub>3</sub>) shows the following chemical shifts (ppm):

- 132.11
- 130.39
- 128.44
- 127.90
- 127.25
- 80.49
- 77.48 CDCl<sub>3</sub>
- 77.16 CDCl<sub>3</sub>
- 76.84 CDCl<sub>3</sub>
- 73.79
- 73.54
- 70.71
- 64.22
- 57.53
- 31.07
- 29.84
- 29.72
- 29.36
- 27.36
- 25.77
- 25.68
- 25.46
- 20.70
- 14.42

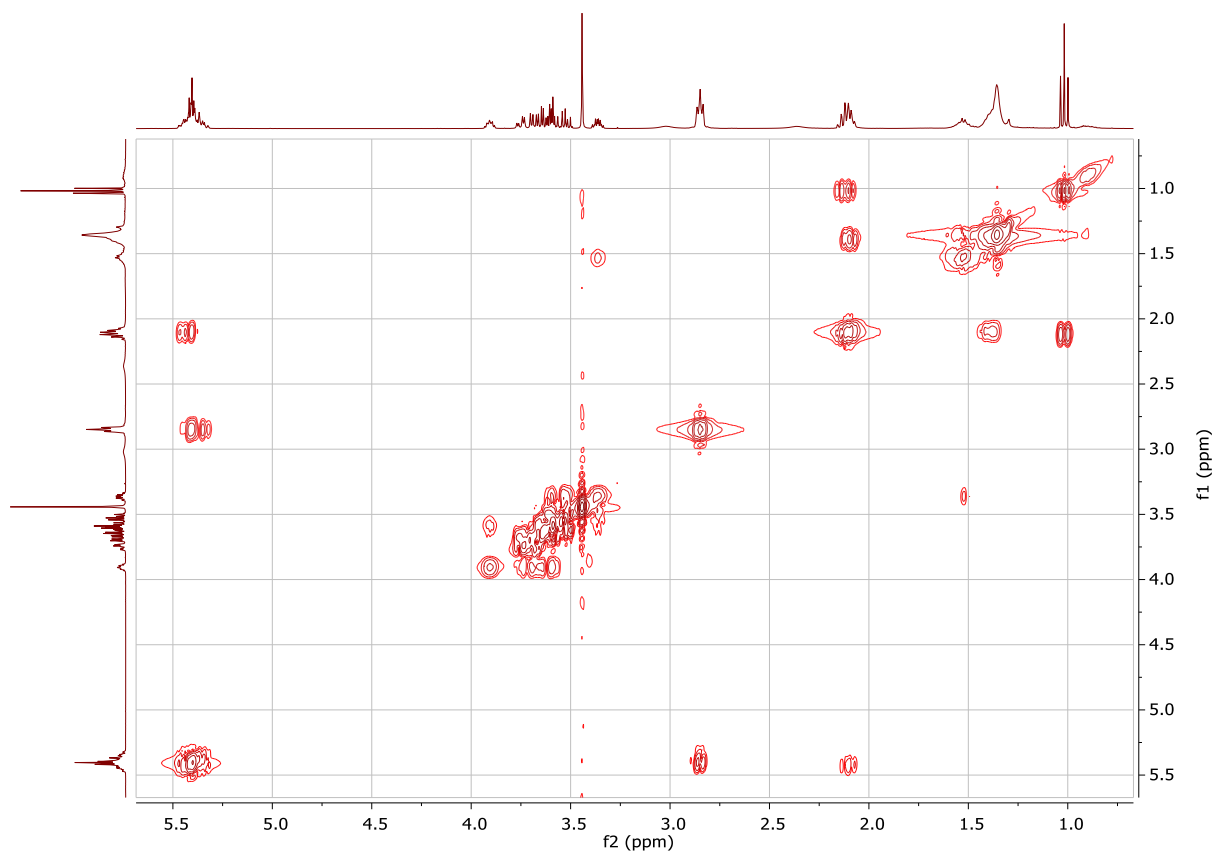

$^{13}\text{C}$ - $^1\text{H}$  HSQC spectrum of MEL 5

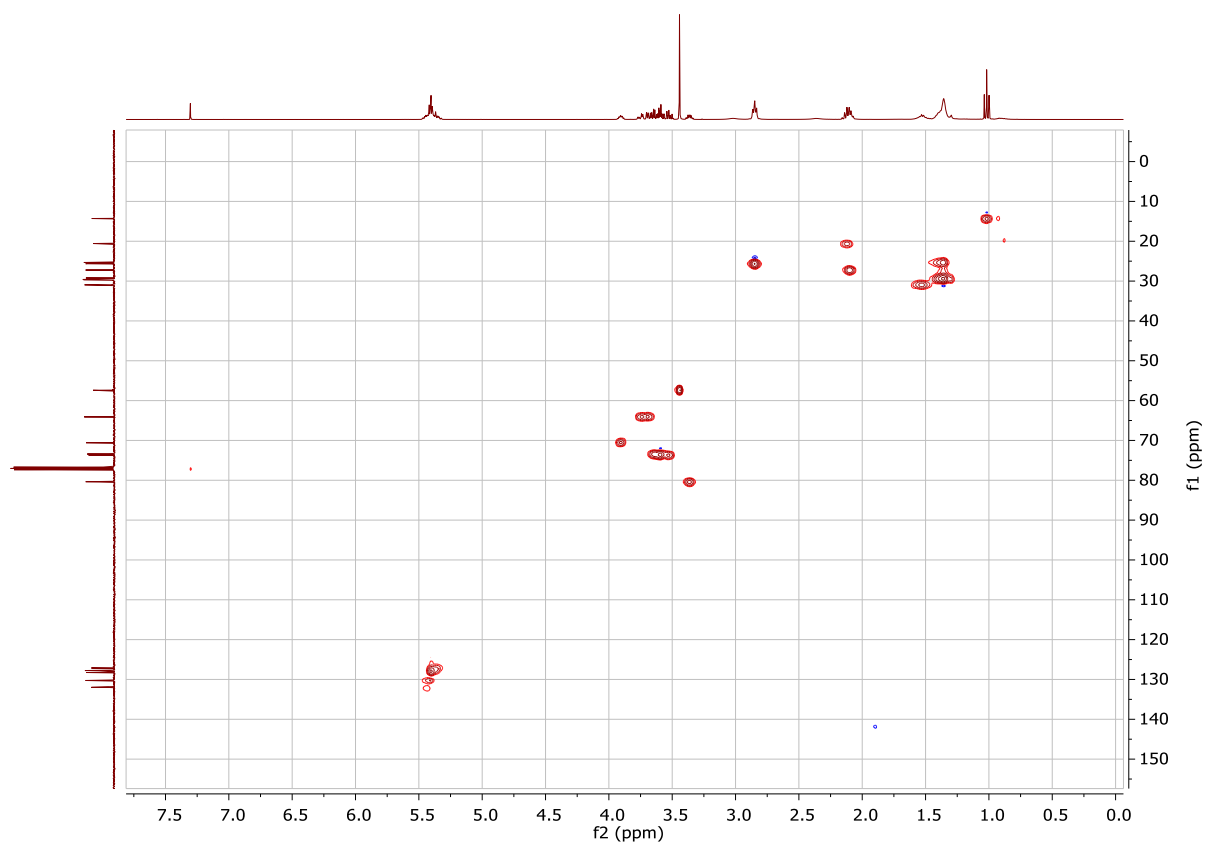

$^1\text{H}$  NMR (400 MHz,  $\text{CDCl}_3$ ) of compound **14**

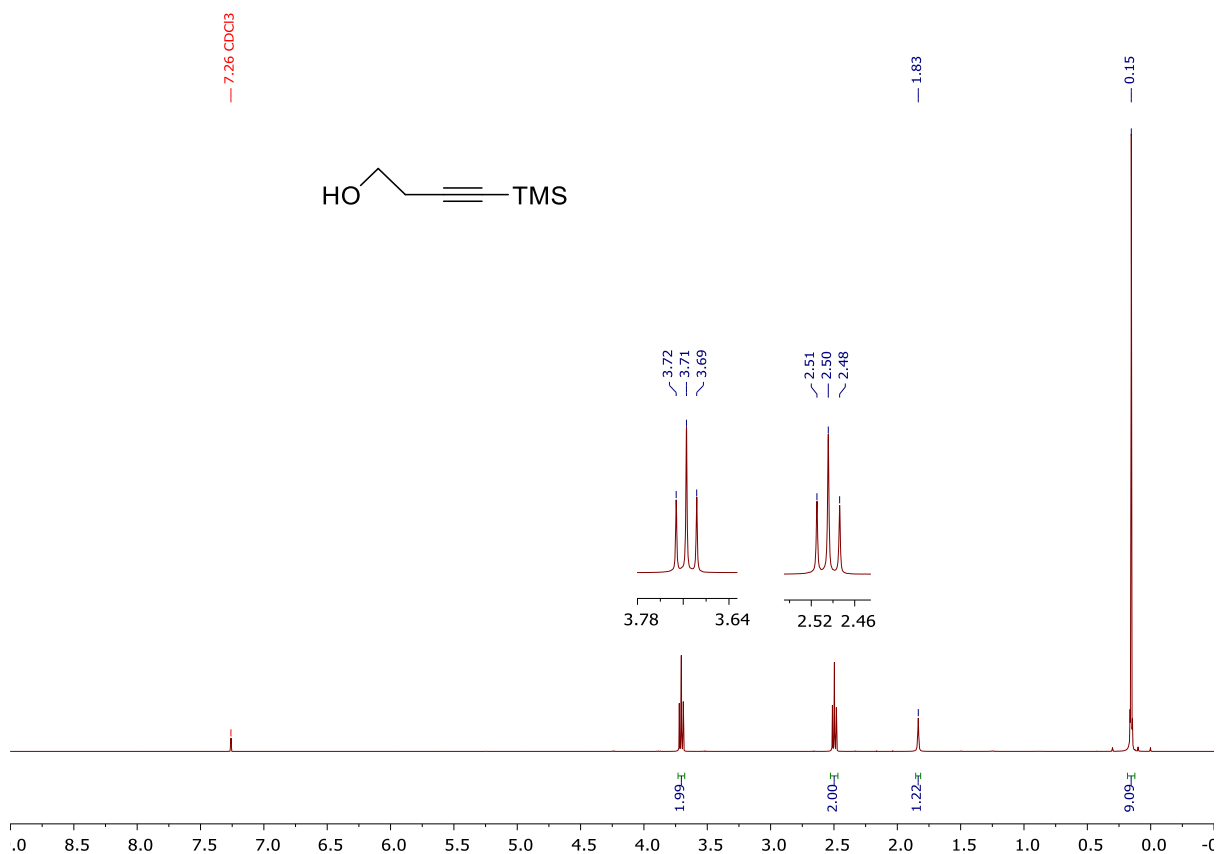

$^{13}\text{C}\{^1\text{H}\}$  NMR (101 MHz,  $\text{CDCl}_3$ ) of compound **14**

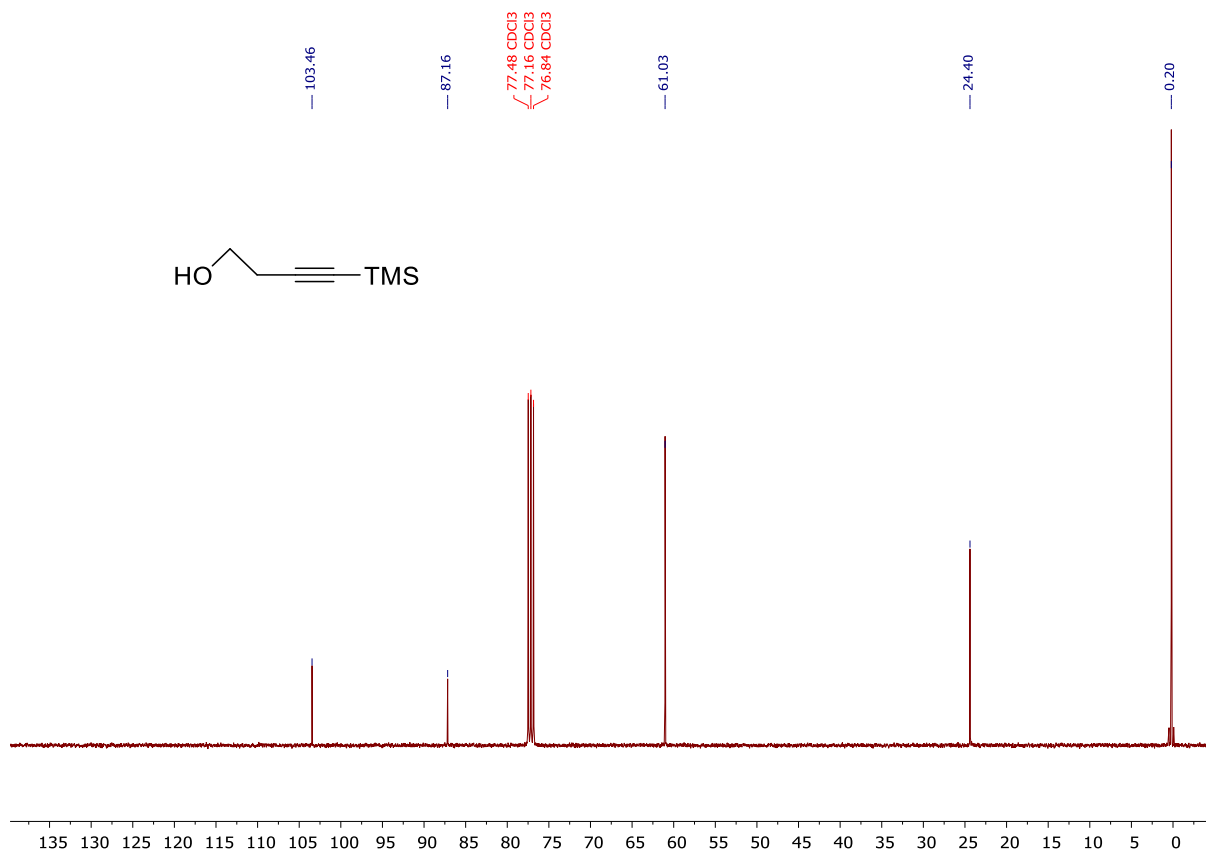

$^1\text{H}$ - $^1\text{H}$  COSY spectrum of compound **14**

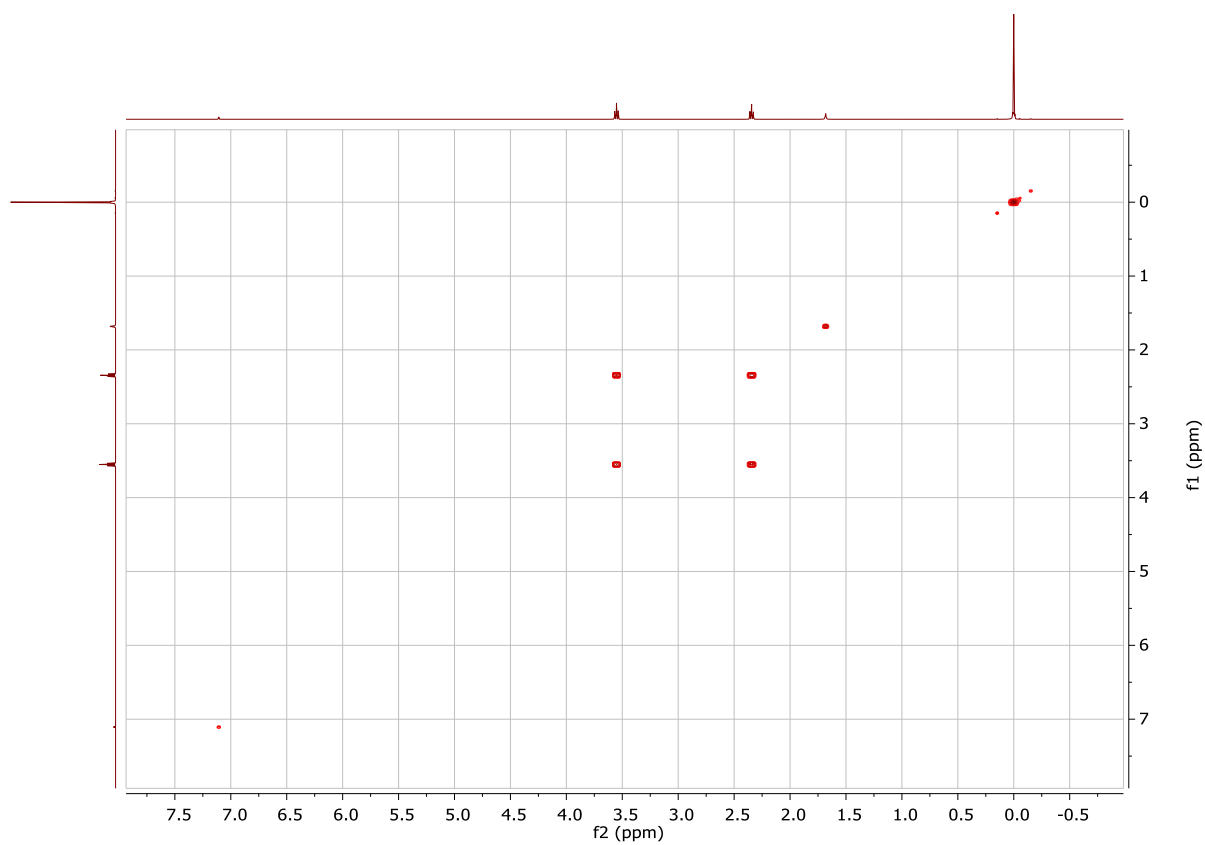

$^{13}\text{C}$ - $^1\text{H}$  HSQC spectrum of compound **14**

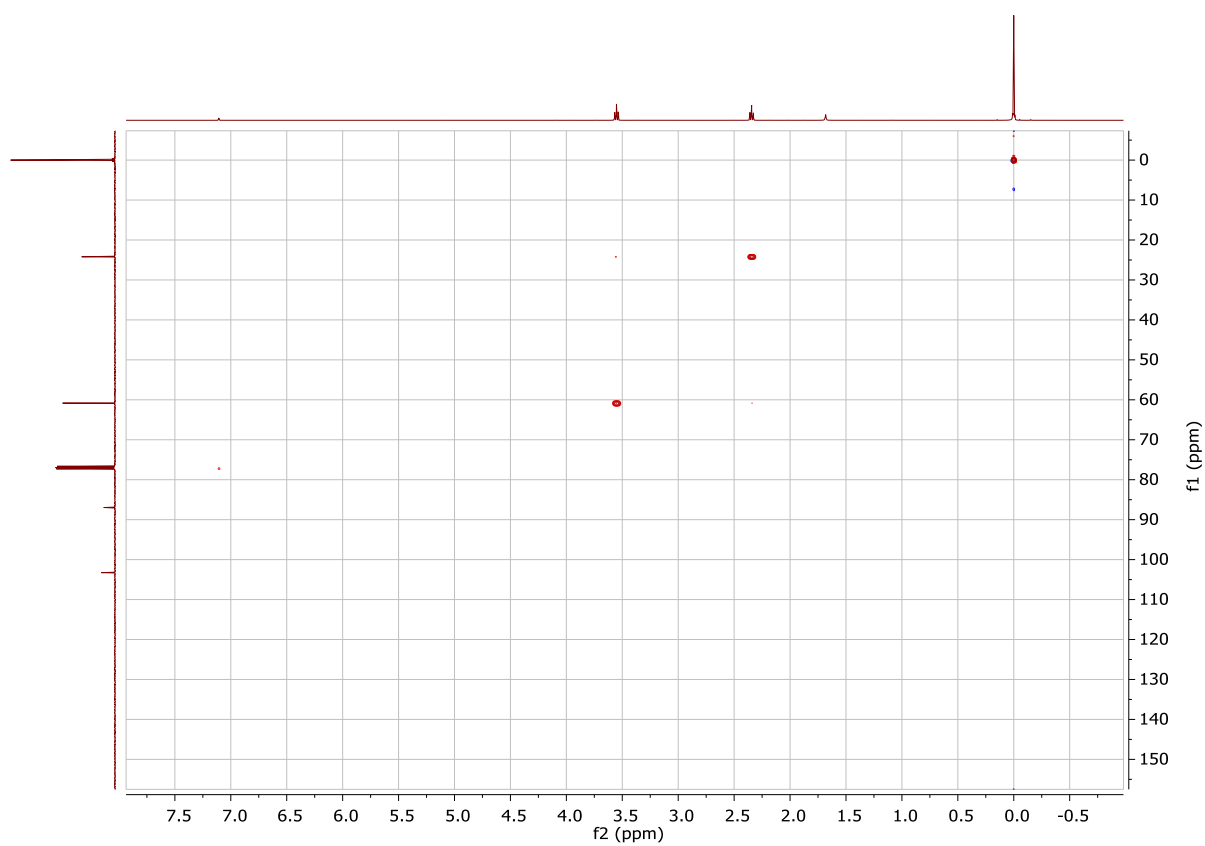

$^1\text{H}$  NMR (400 MHz,  $\text{CDCl}_3$ ) of compound **15**

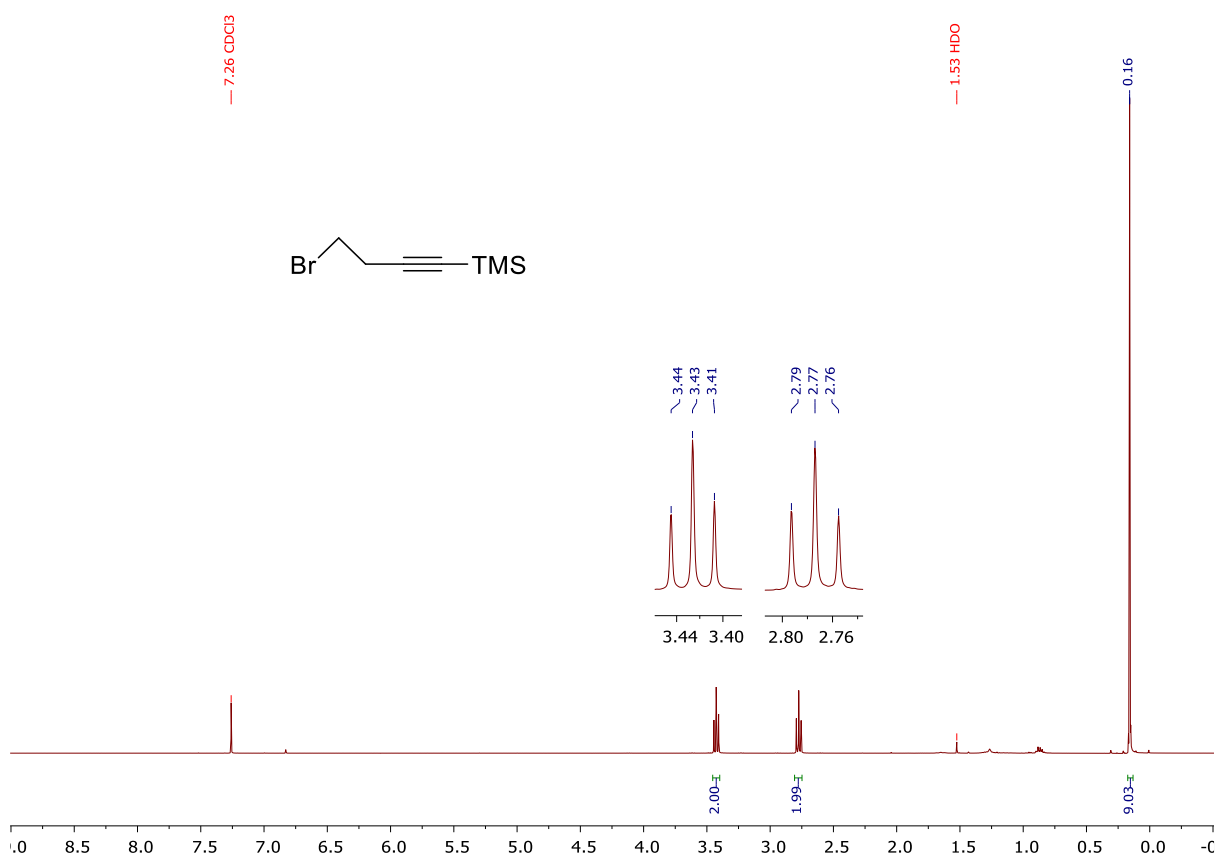

$^{13}\text{C}\{^1\text{H}\}$  NMR (101 MHz,  $\text{CDCl}_3$ ) of compound **15**

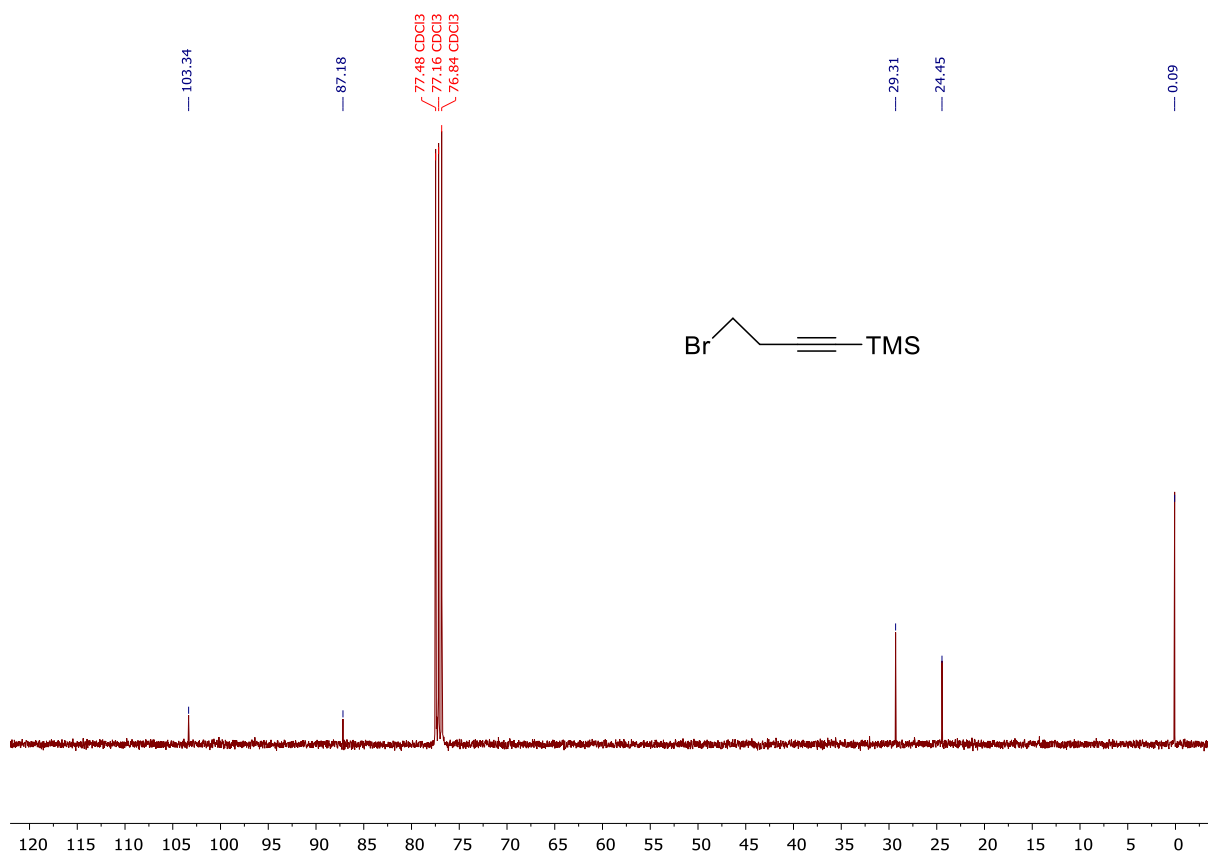

$^1\text{H}$  NMR (400 MHz,  $\text{CDCl}_3$ ) of compound **16**

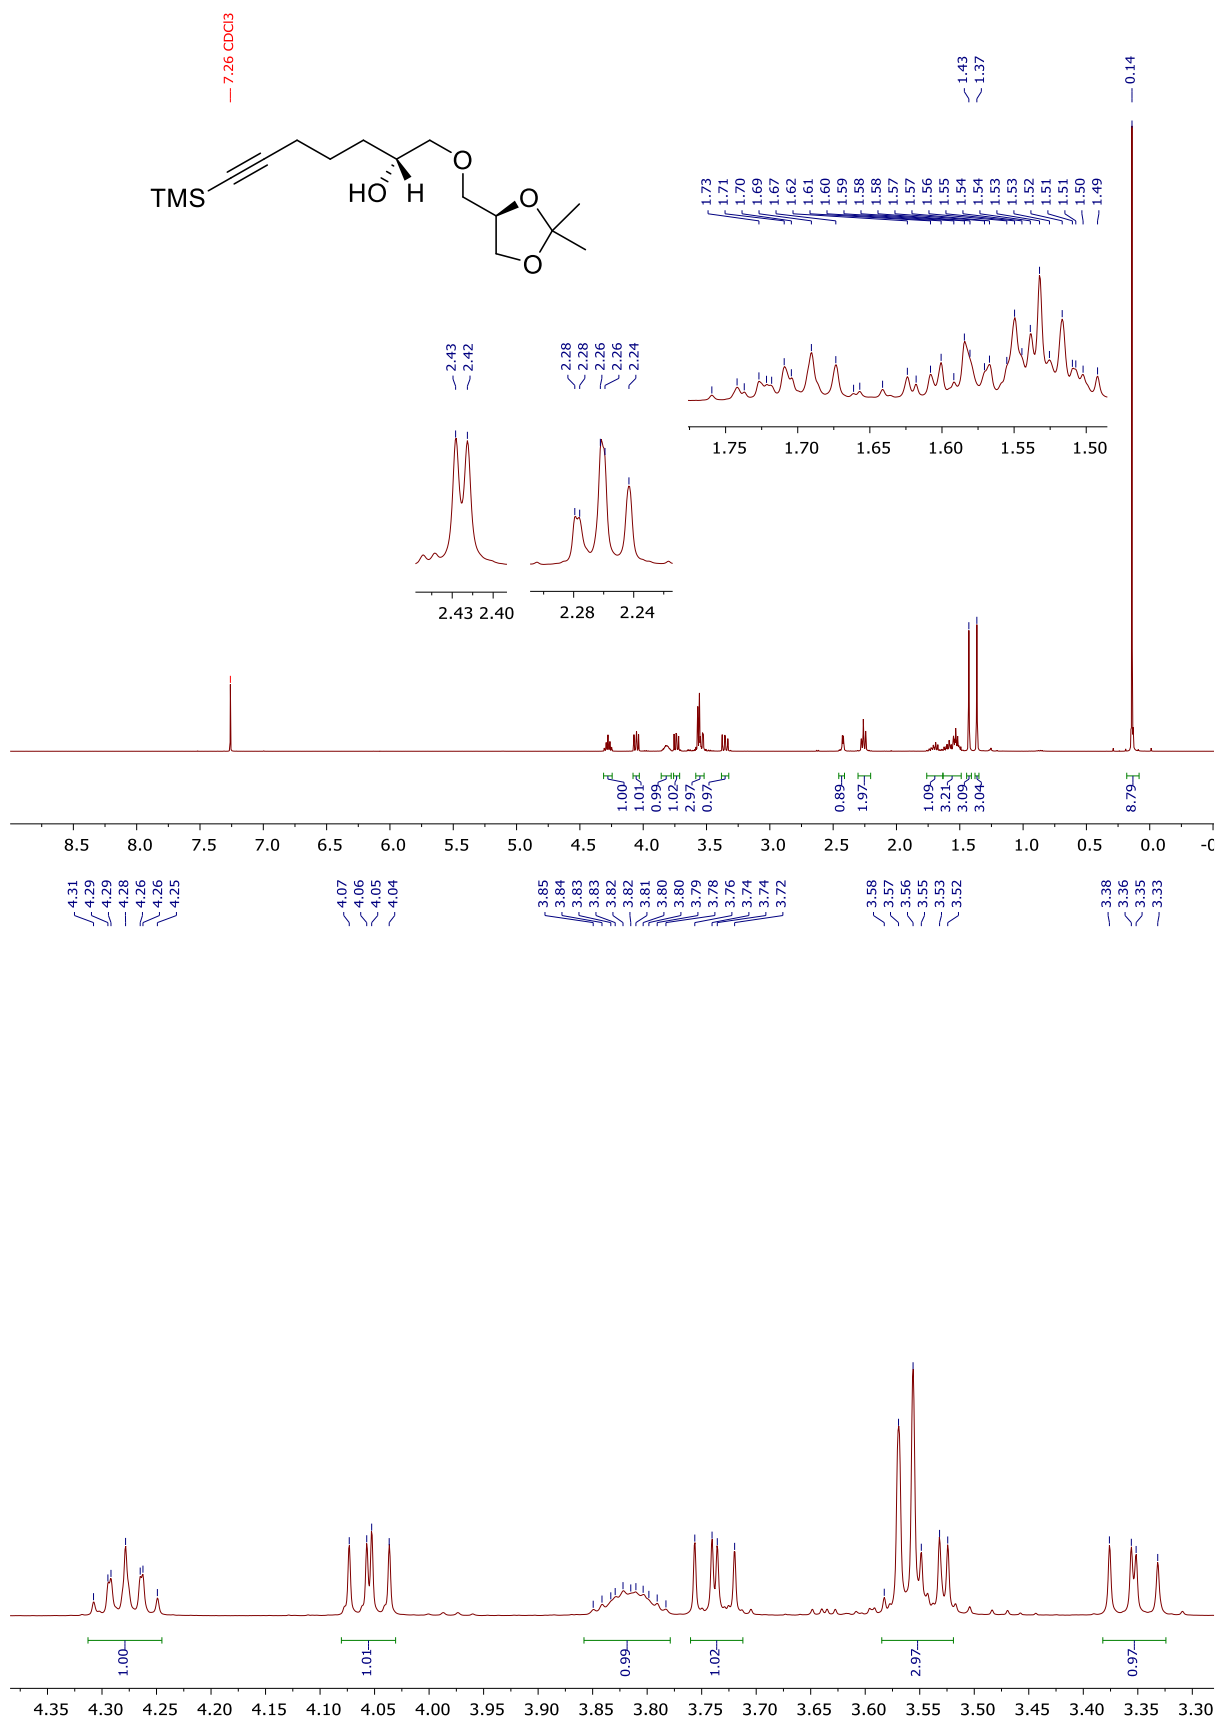

$^{13}\text{C}\{^1\text{H}\}$  NMR (101 MHz,  $\text{CDCl}_3$ ) of compound **16**

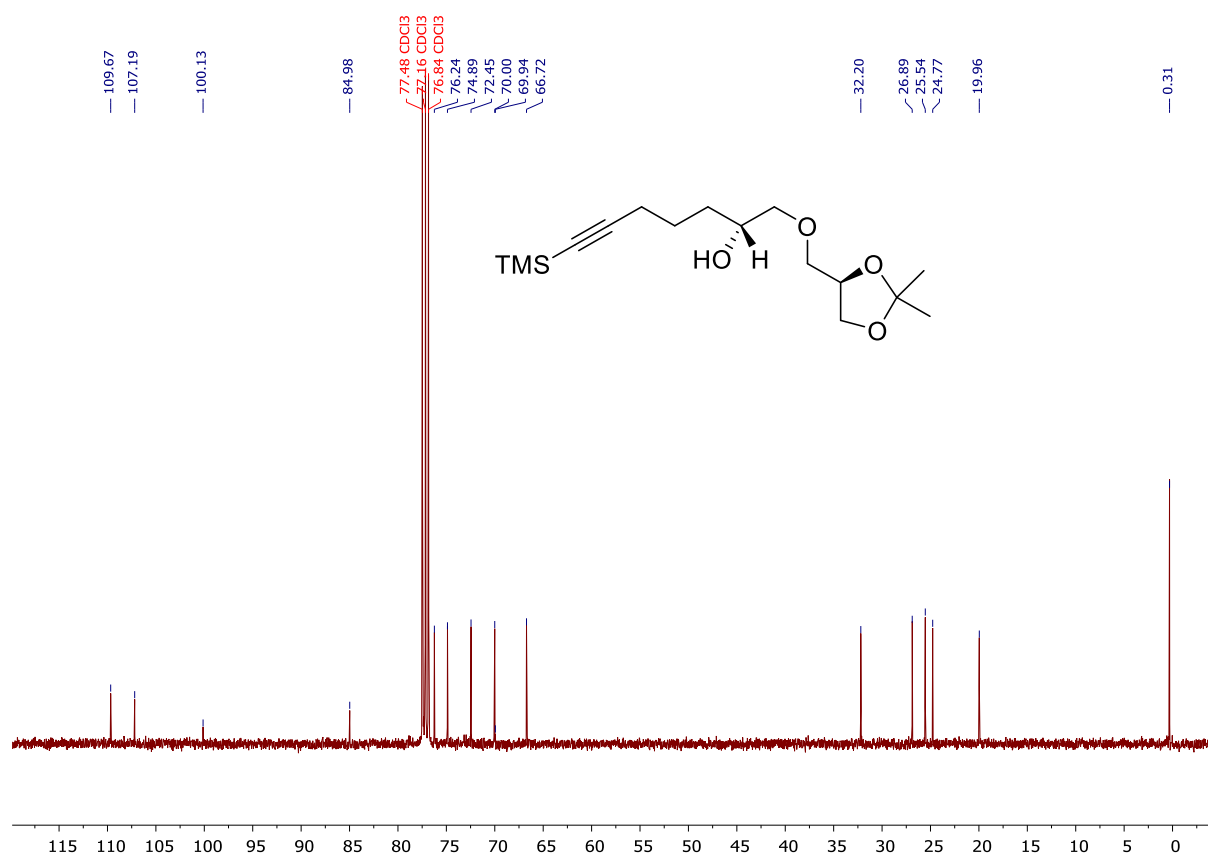

$^1\text{H}$ - $^1\text{H}$  COSY spectrum of compound **16**

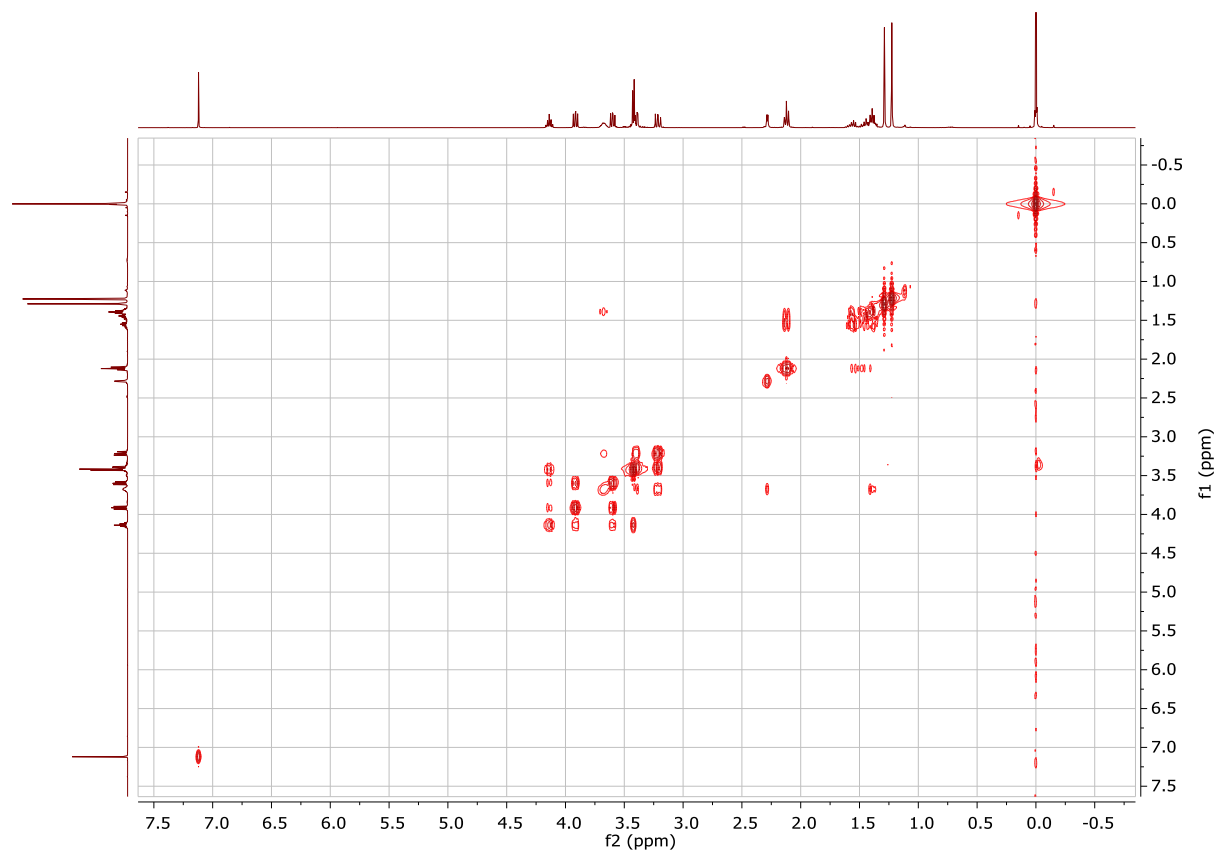

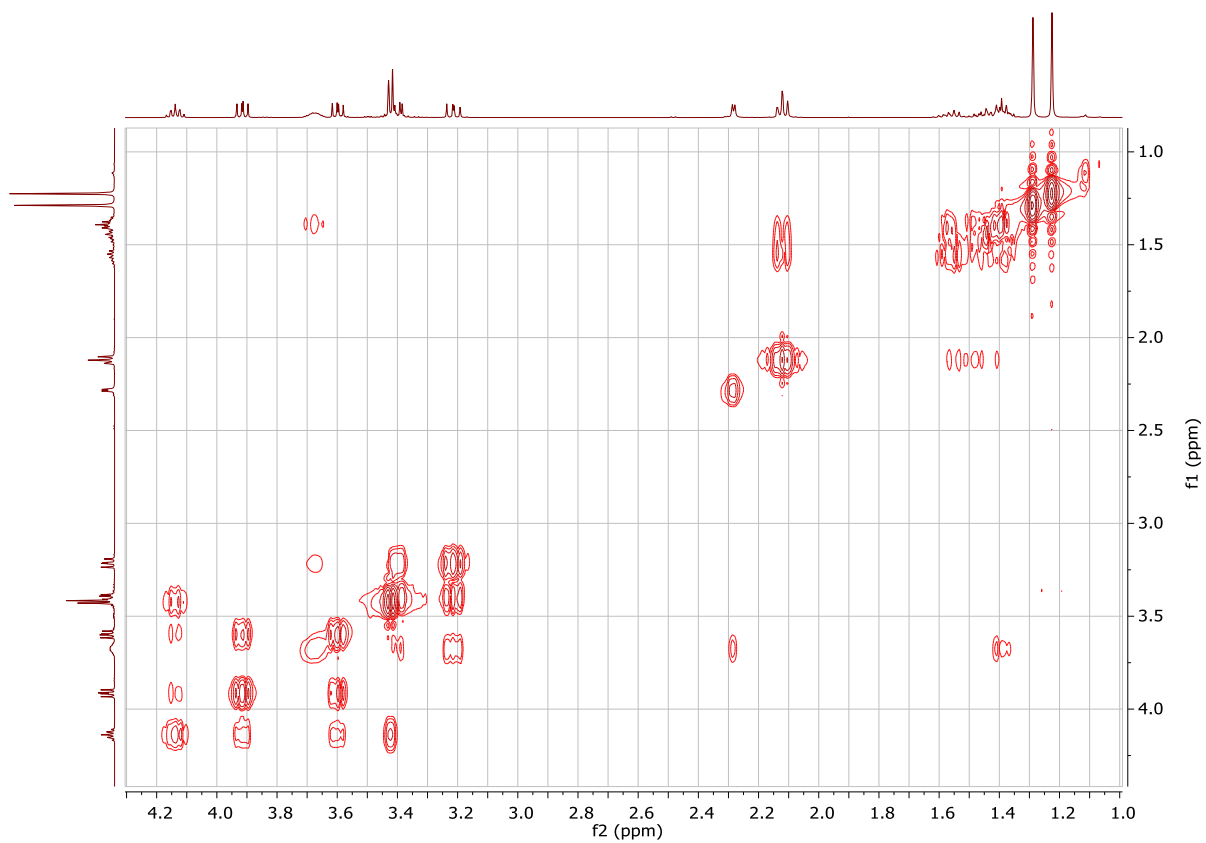

$^{13}\text{C}$ - $^1\text{H}$  HSQC spectrum of compound **16**

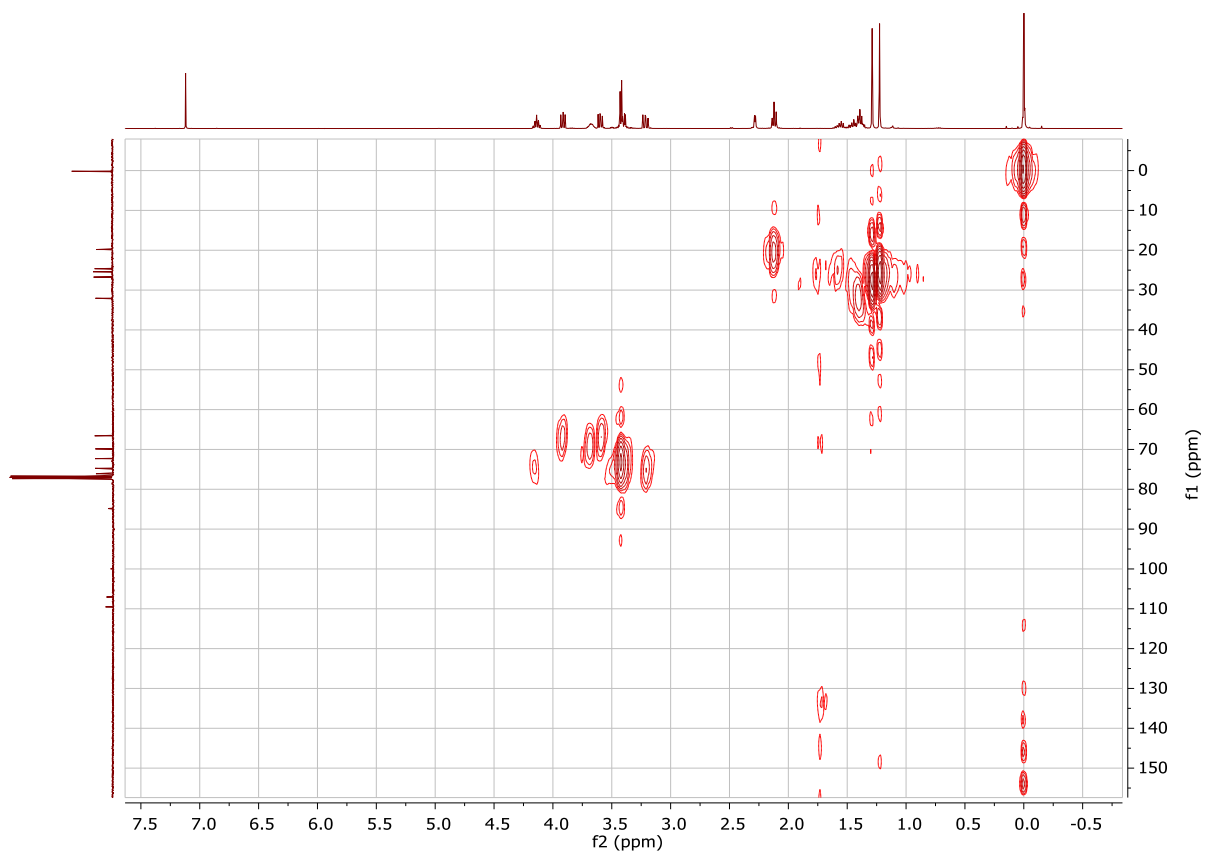

$^1\text{H}$  NMR (400 MHz,  $\text{CDCl}_3$ ) of compound **17**

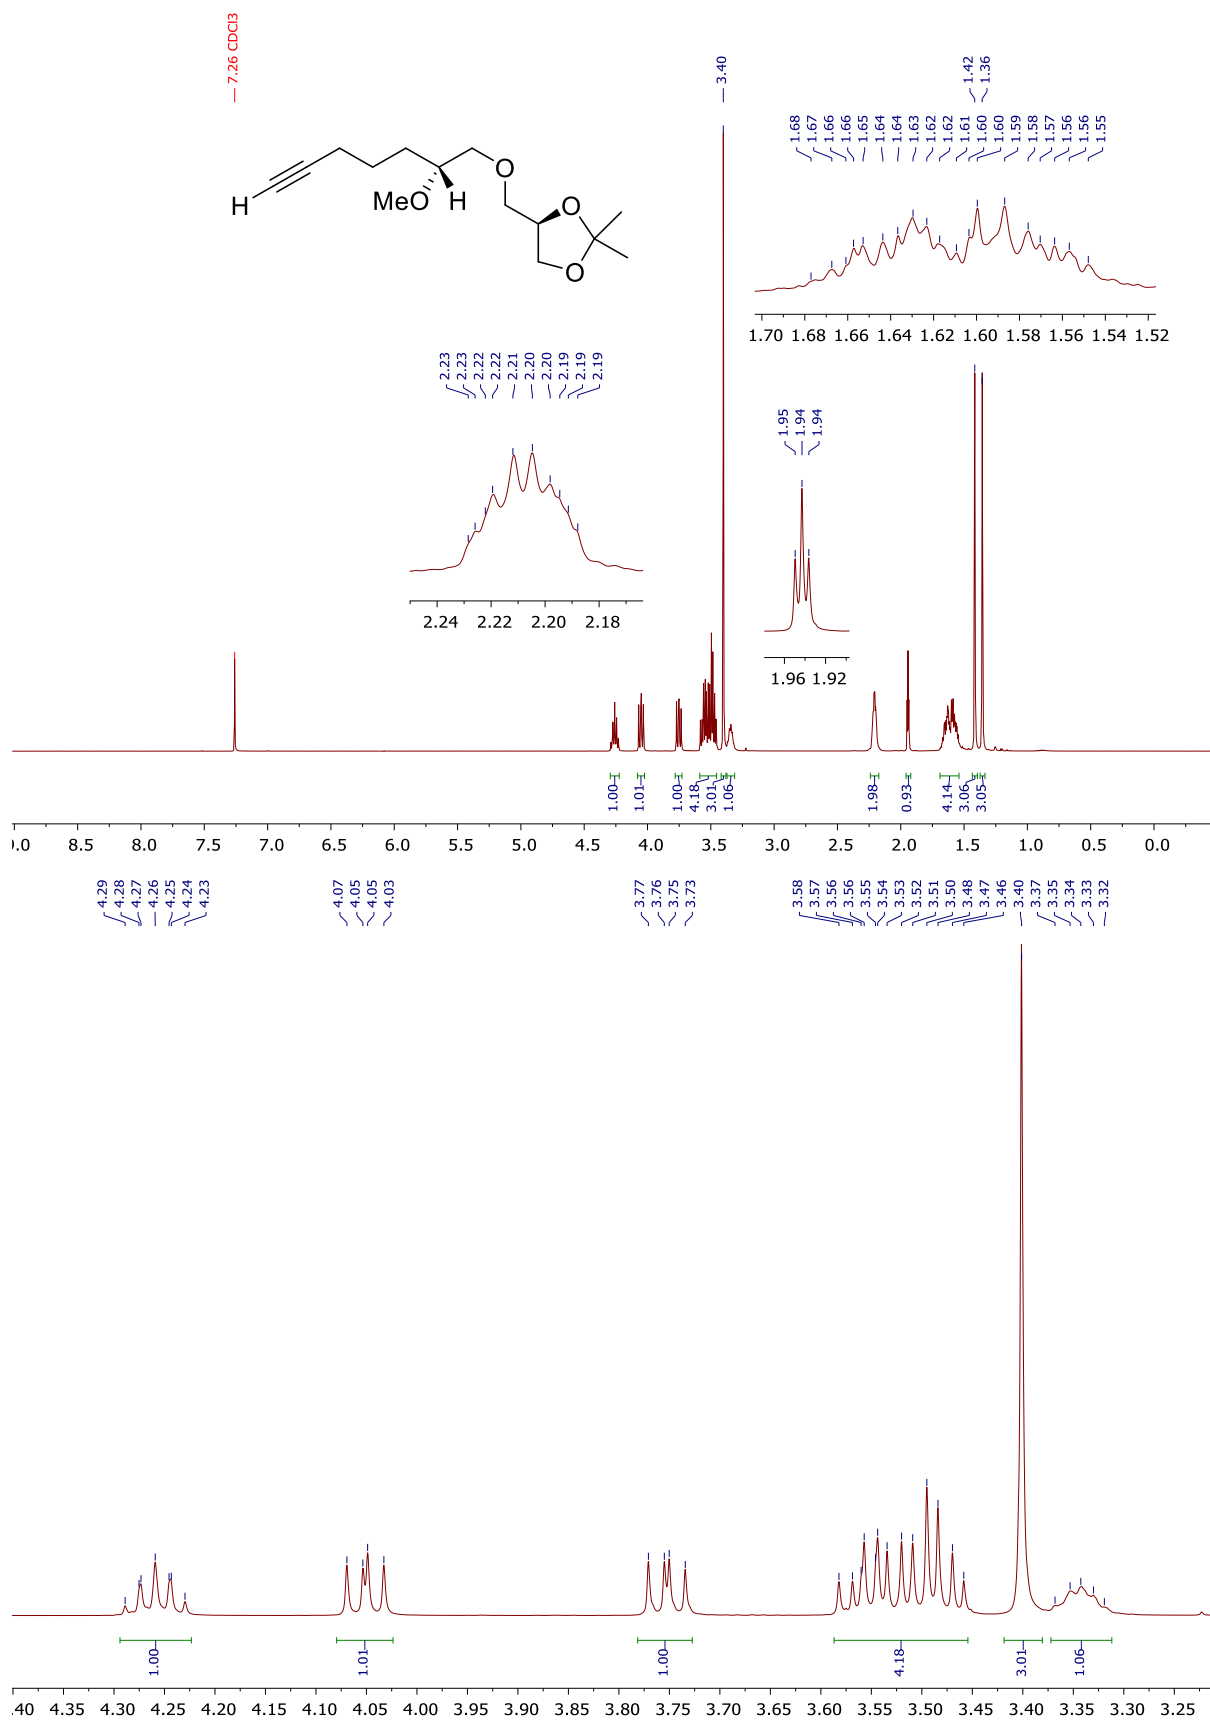

$^{13}\text{C}\{\text{H}\}$  NMR (101 MHz,  $\text{CDCl}_3$ ) of compound **17**

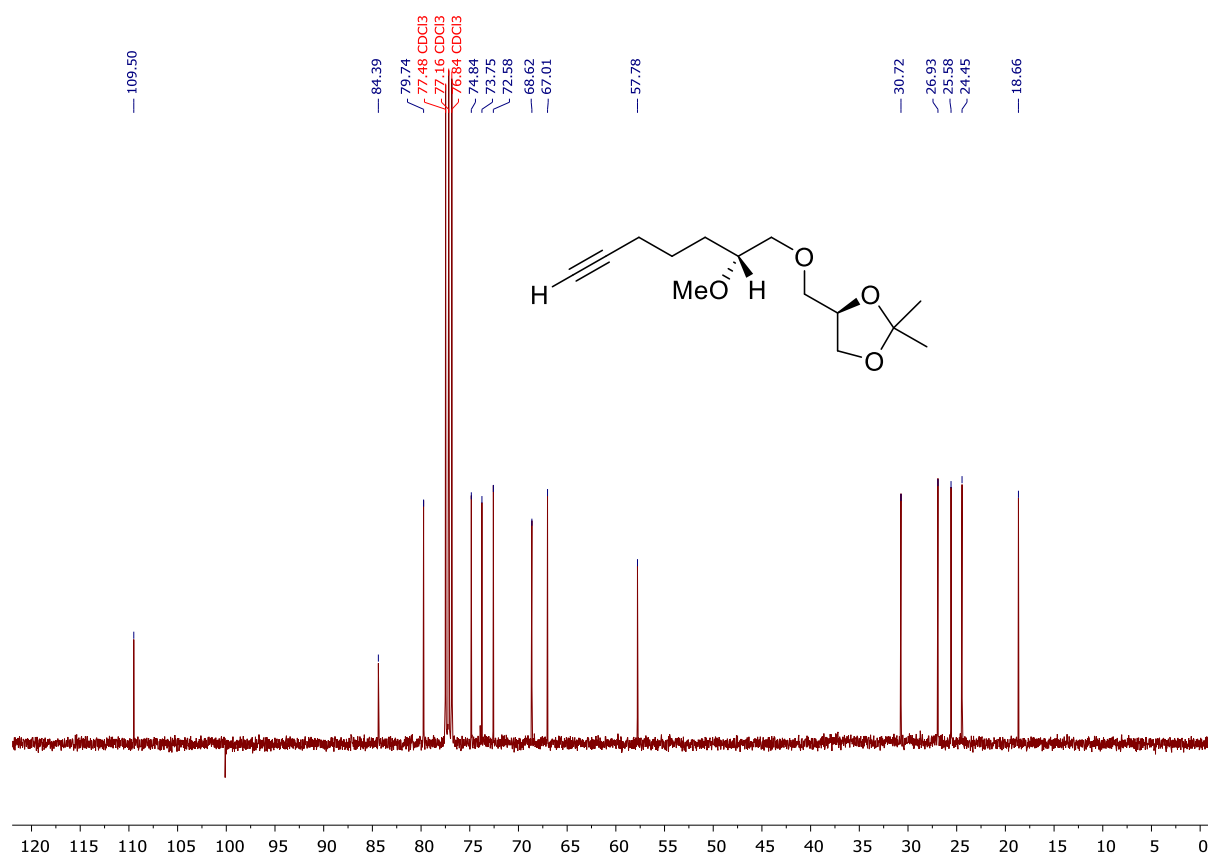

$^1\text{H}$ - $^1\text{H}$  COSY spectrum of compound **17**

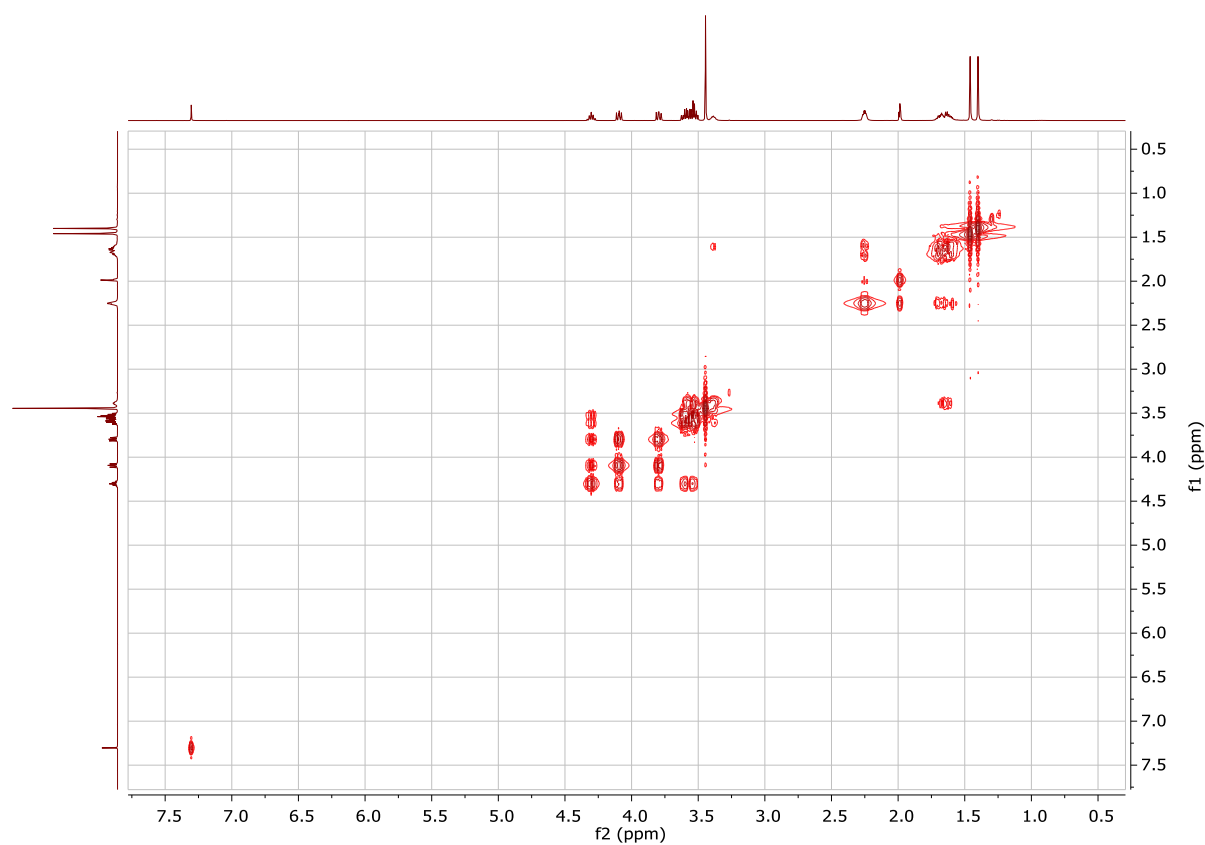

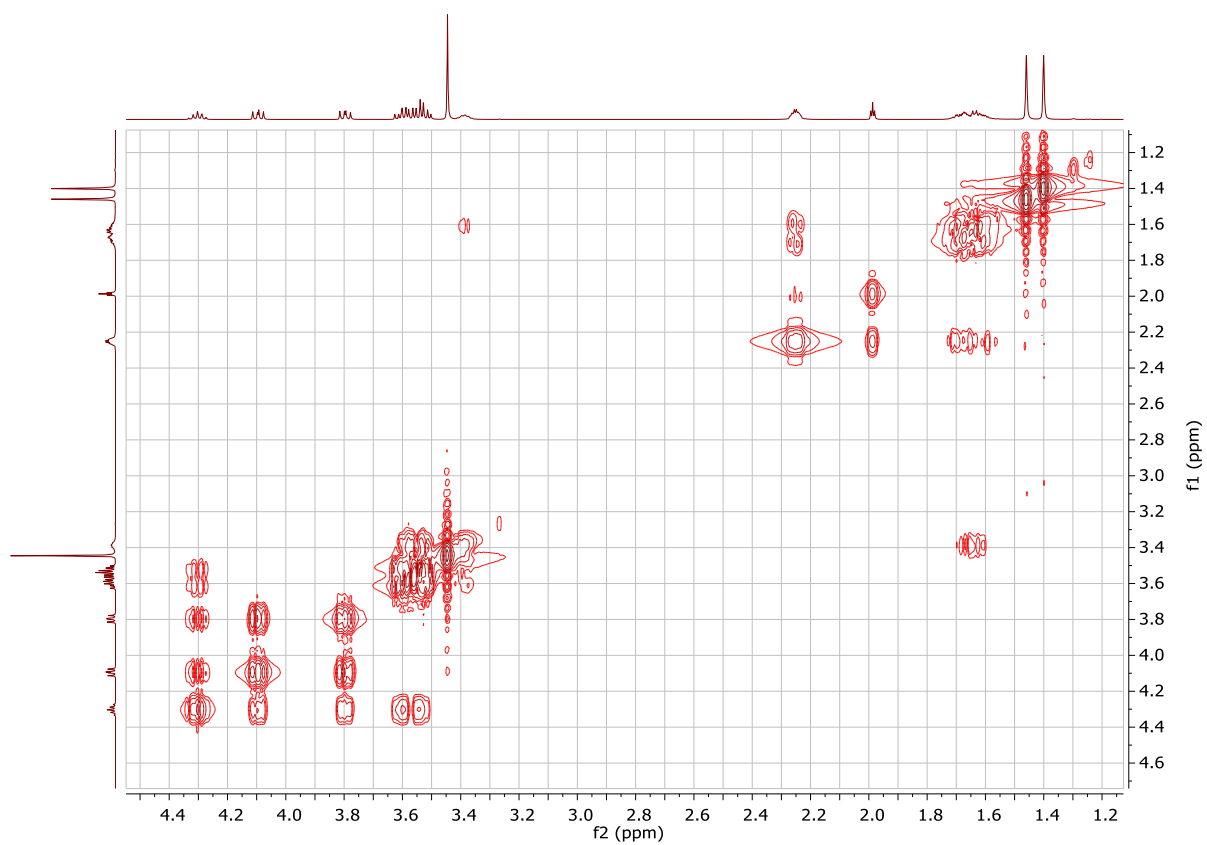

$^{13}\text{C}$ - $^1\text{H}$  HSQC spectrum of compound **17**

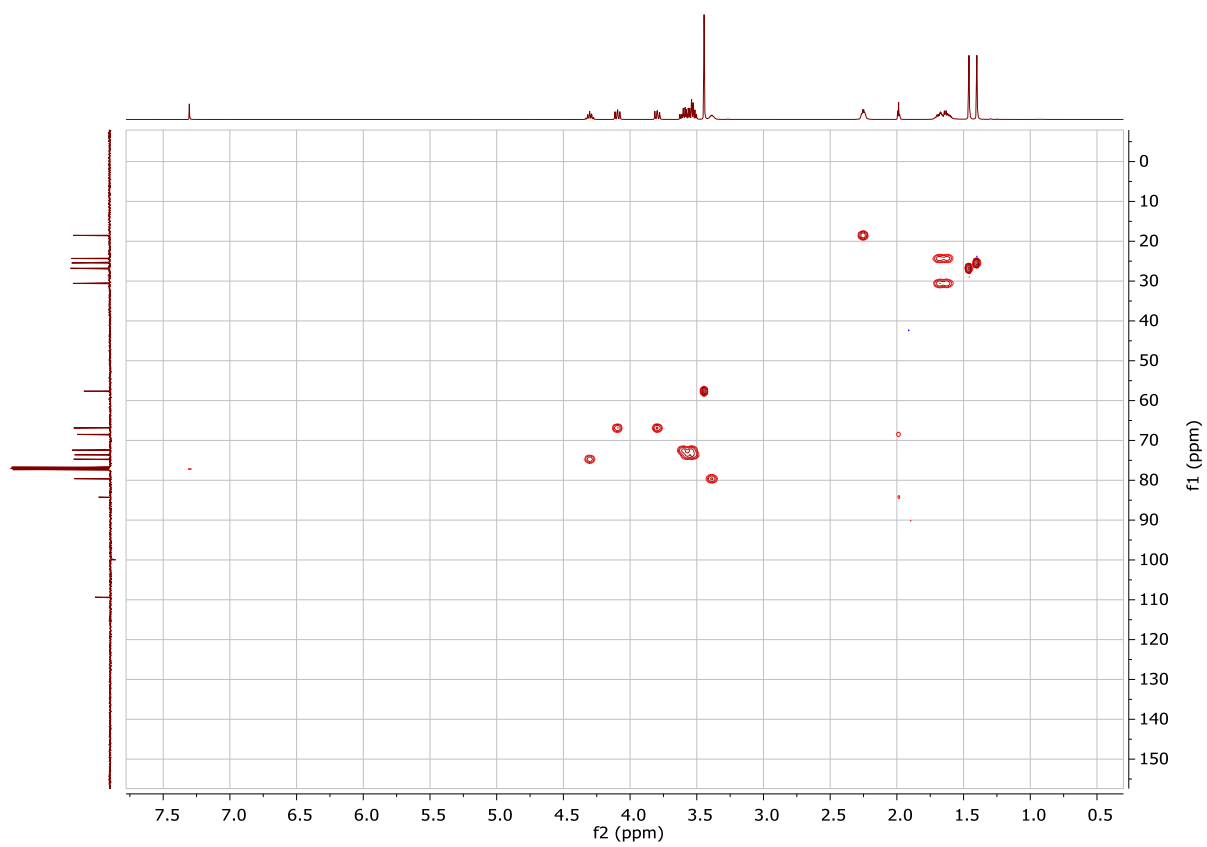

$^1\text{H}$  NMR (400 MHz,  $\text{CDCl}_3$ ) of compound **18**

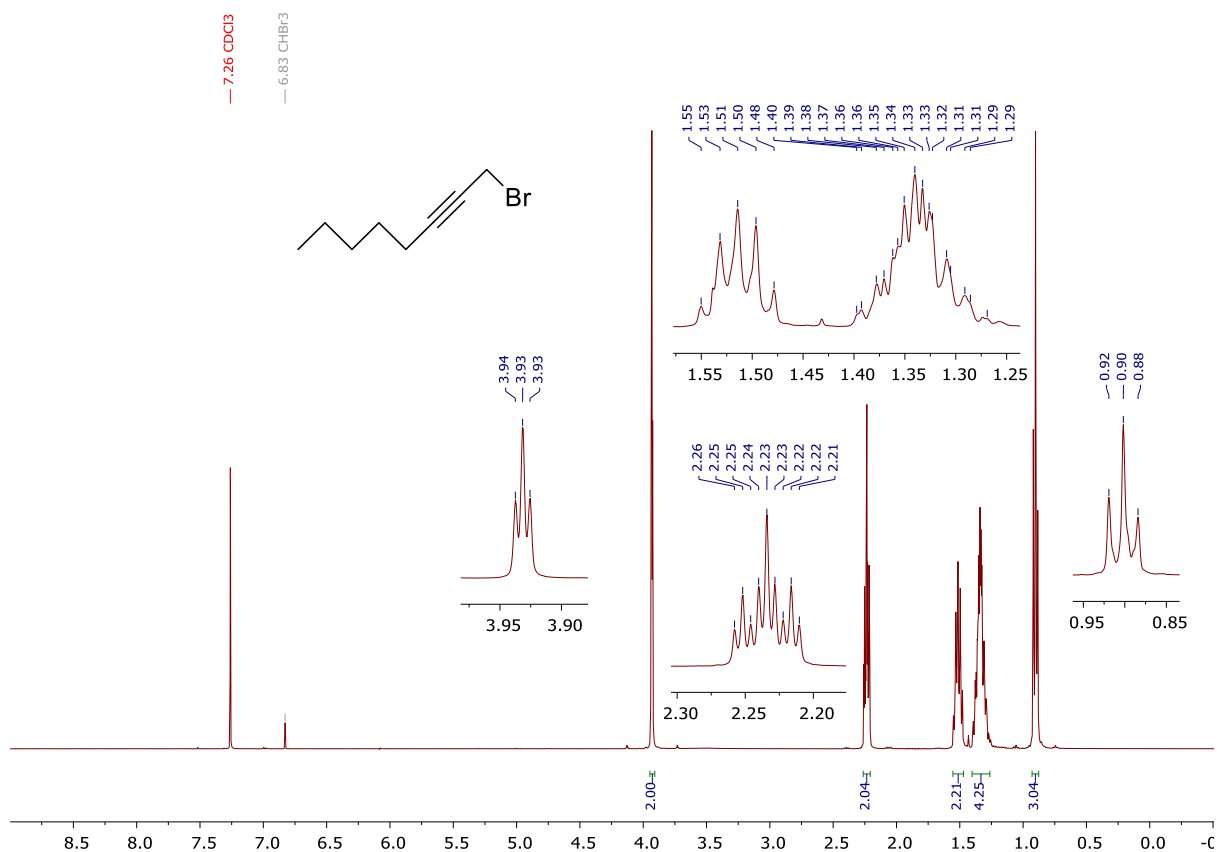

$^{13}\text{C}\{^1\text{H}\}$  NMR (101 MHz,  $\text{CDCl}_3$ ) of compound **18**

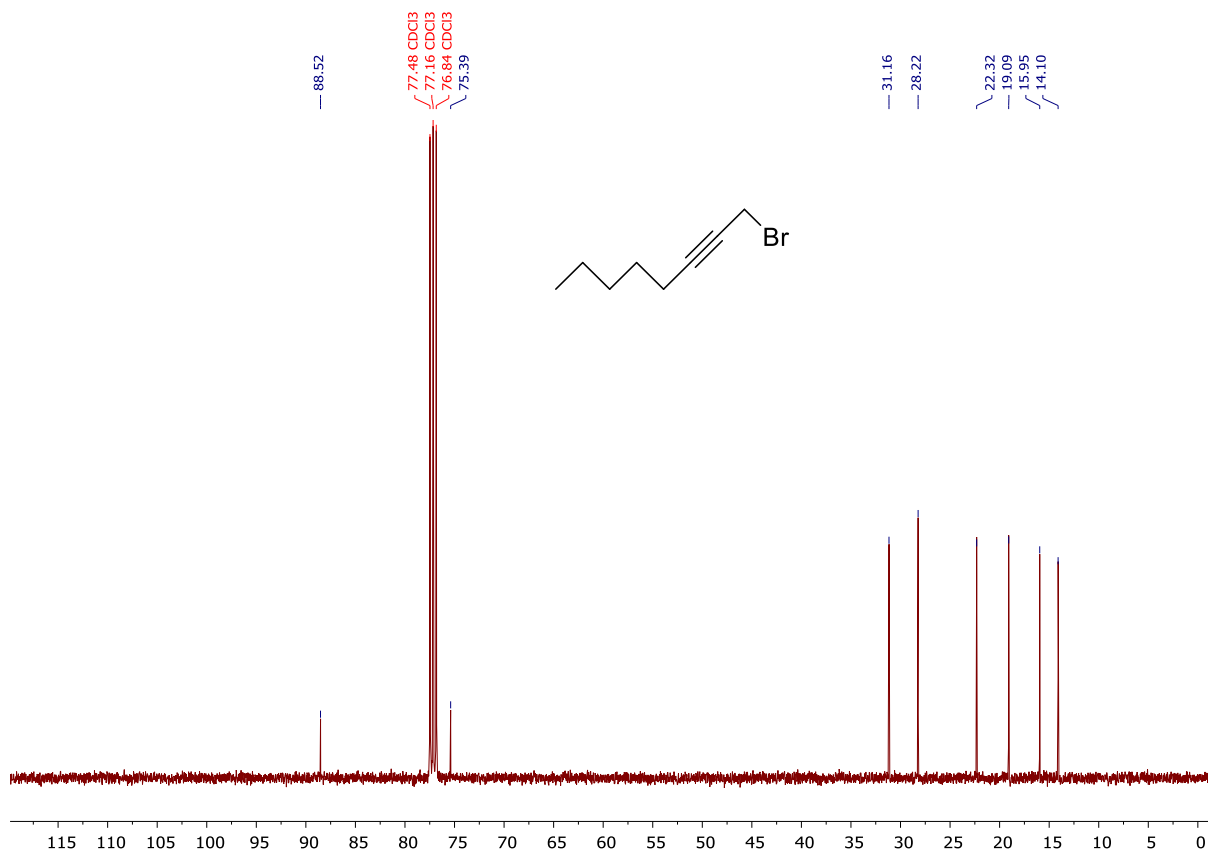

$^1\text{H}$ - $^1\text{H}$  COSY spectrum of compound **18**

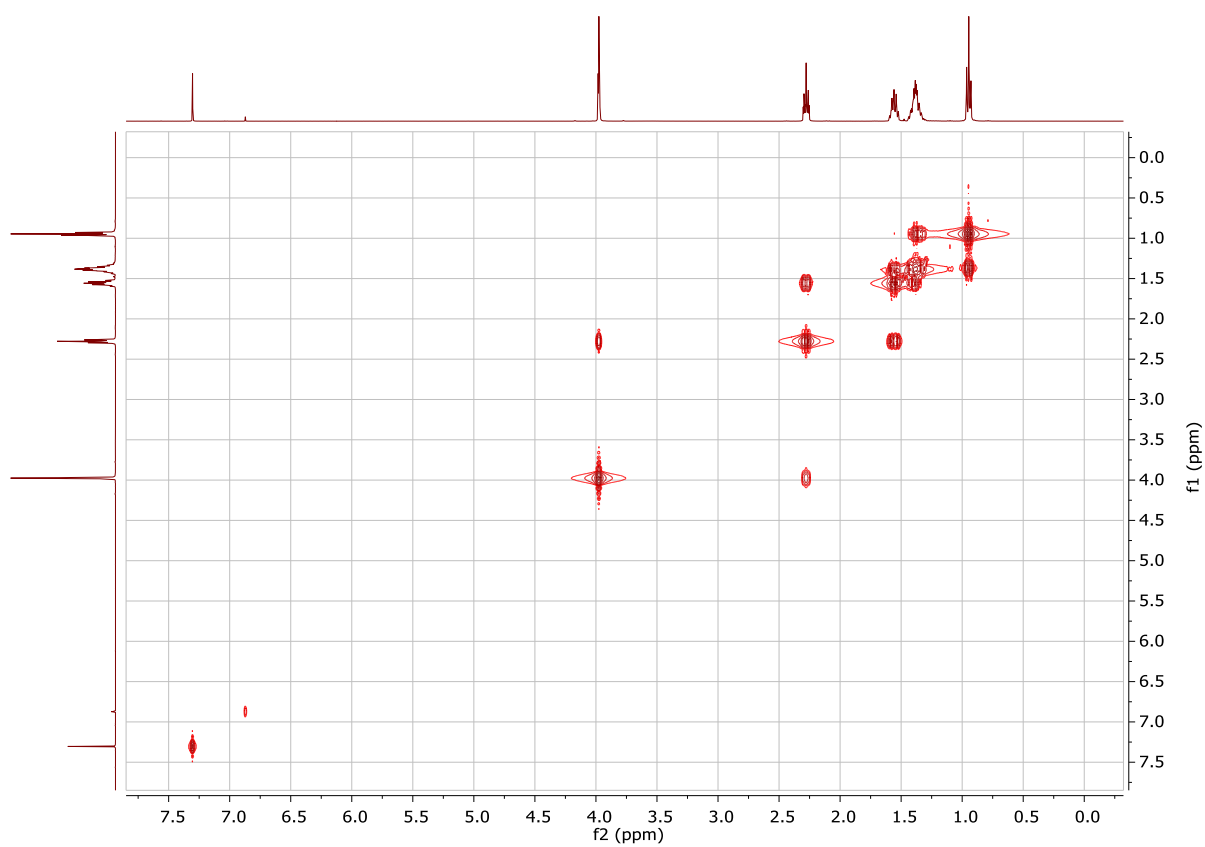

$^{13}\text{C}$ - $^1\text{H}$  HSQC spectrum of compound **18**

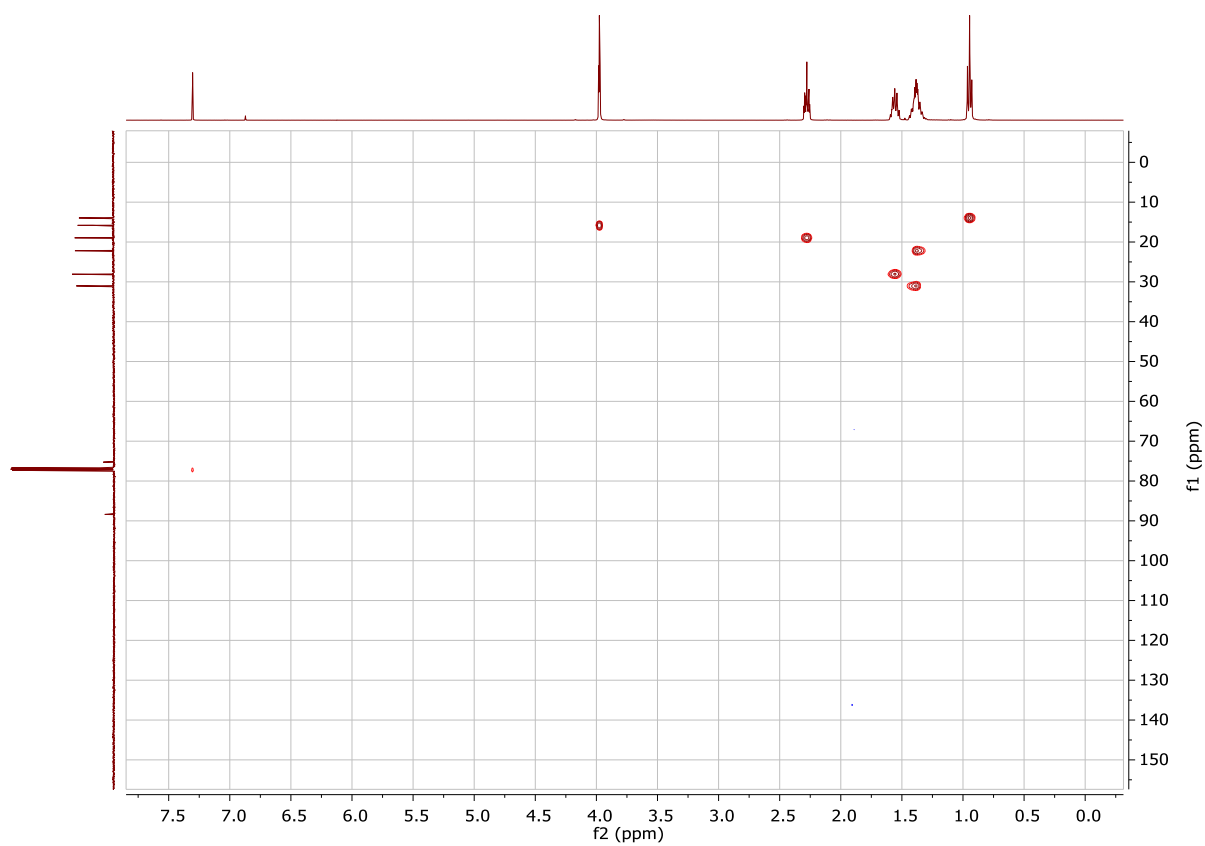

$^1\text{H}$  NMR (400 MHz,  $\text{CDCl}_3$ ) of compound **19**

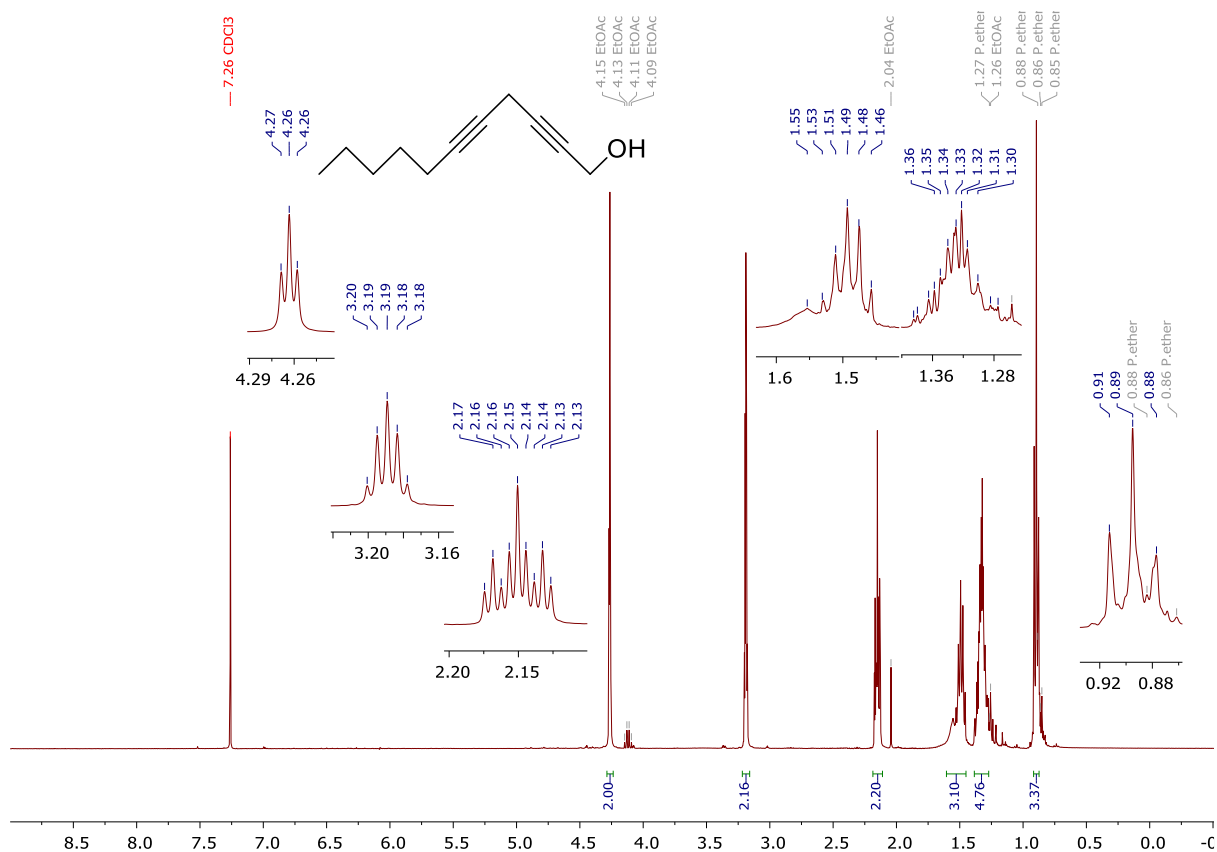

$^{13}\text{C}\{\text{H}\}$  NMR (101 MHz,  $\text{CDCl}_3$ ) of compound **19**

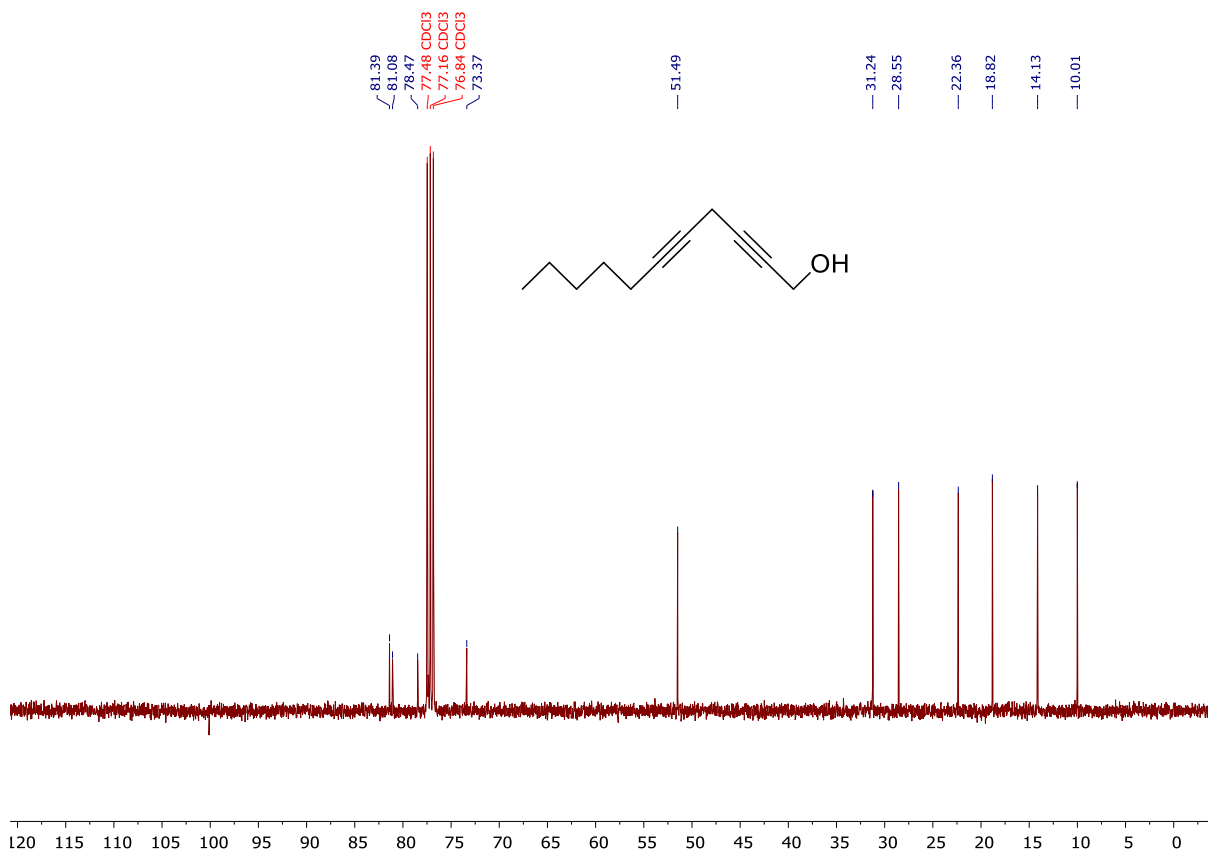

$^1\text{H}$ - $^1\text{H}$  COSY spectrum of compound **19**

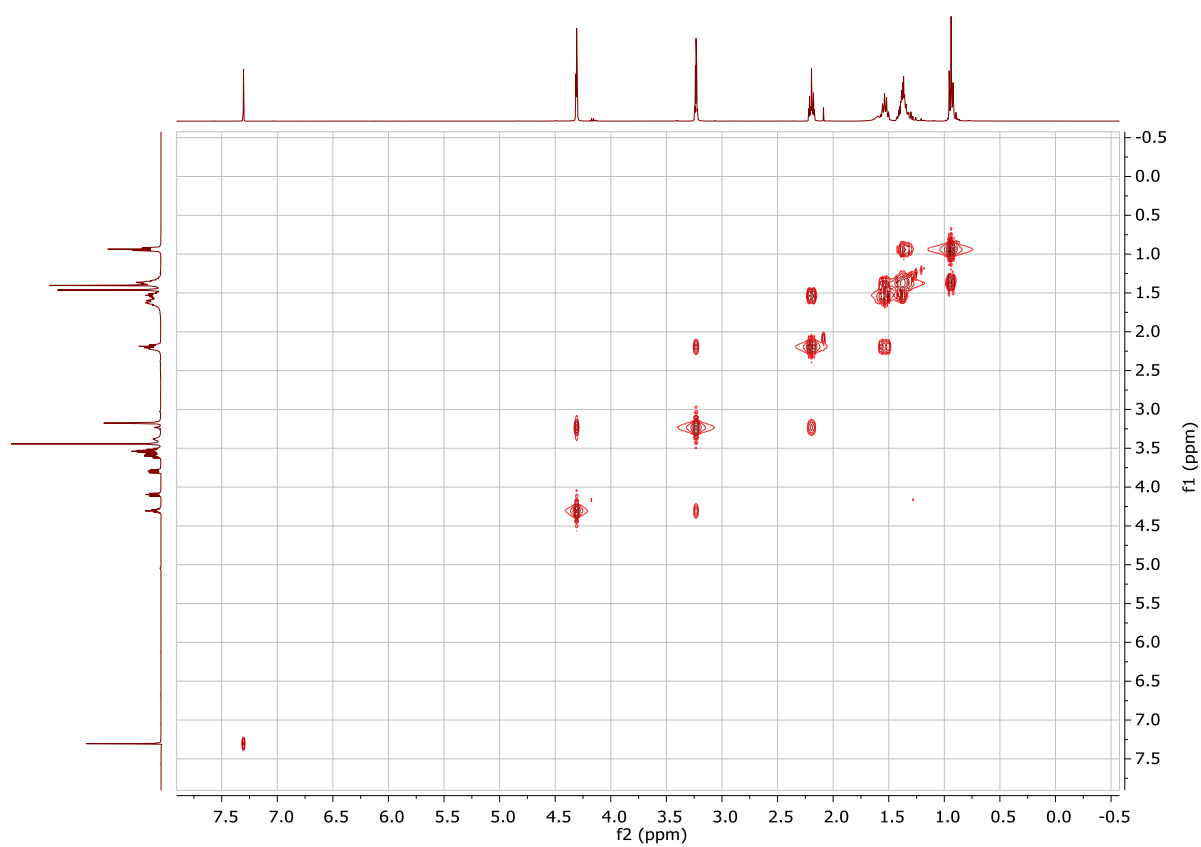

$^{13}\text{C}$ - $^1\text{H}$  HSQC spectrum of compound **19**

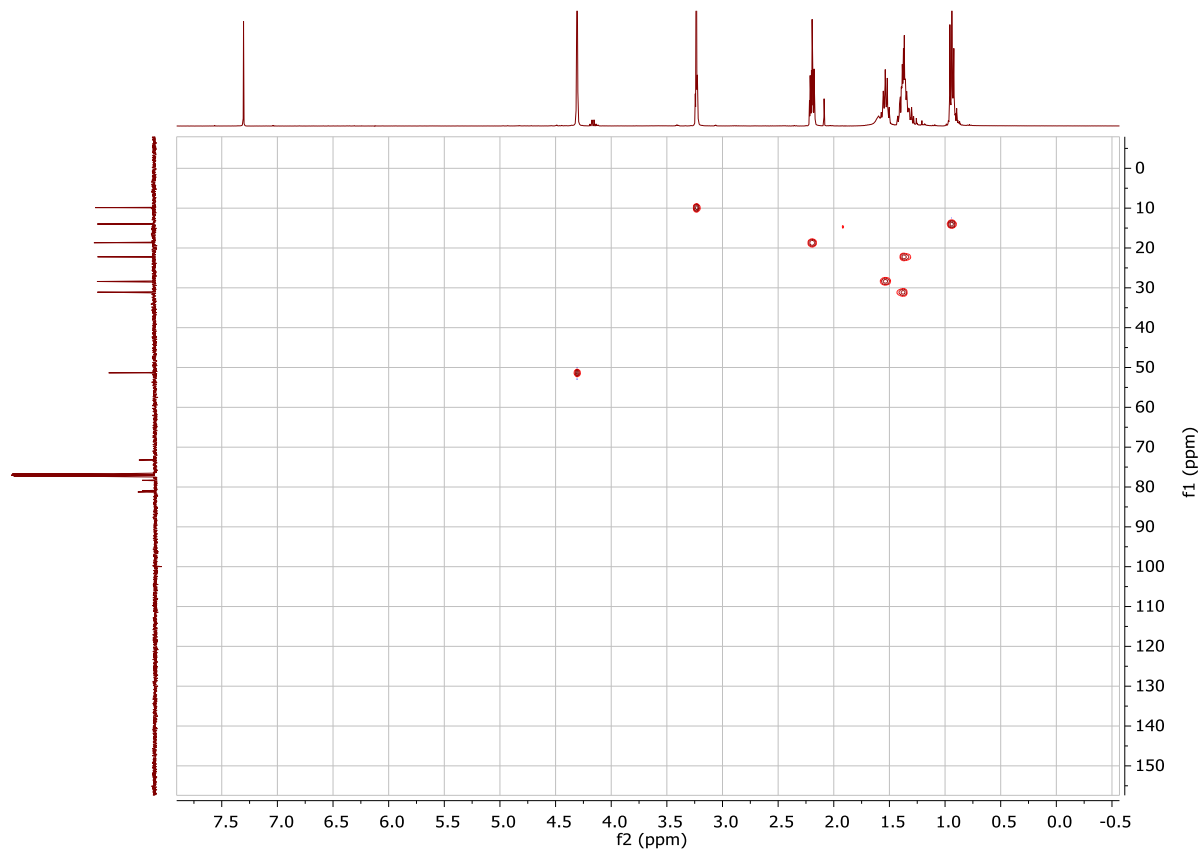

$^1\text{H}$  NMR (400 MHz,  $\text{CDCl}_3$ ) of compound **20**

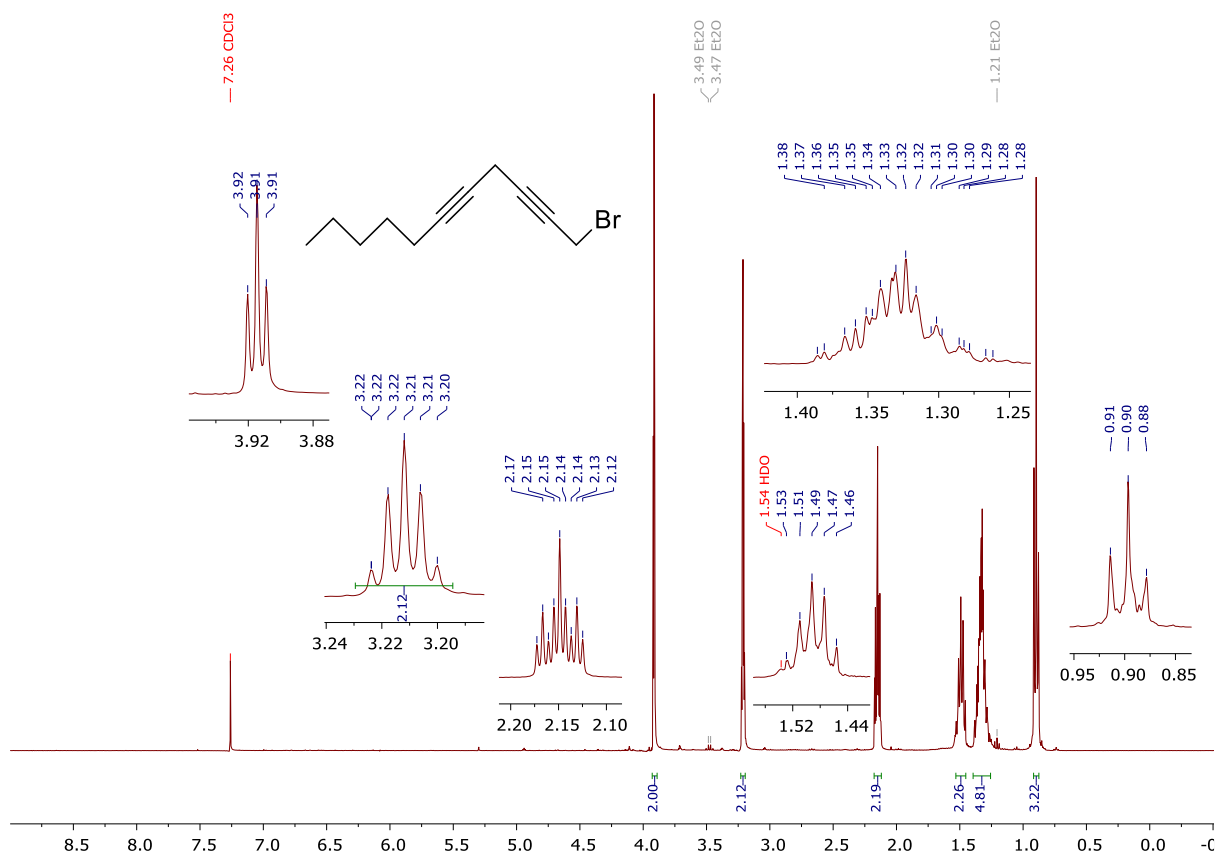

$^{13}\text{C}\{^1\text{H}\}$  NMR (101 MHz,  $\text{CDCl}_3$ ) of compound **20**

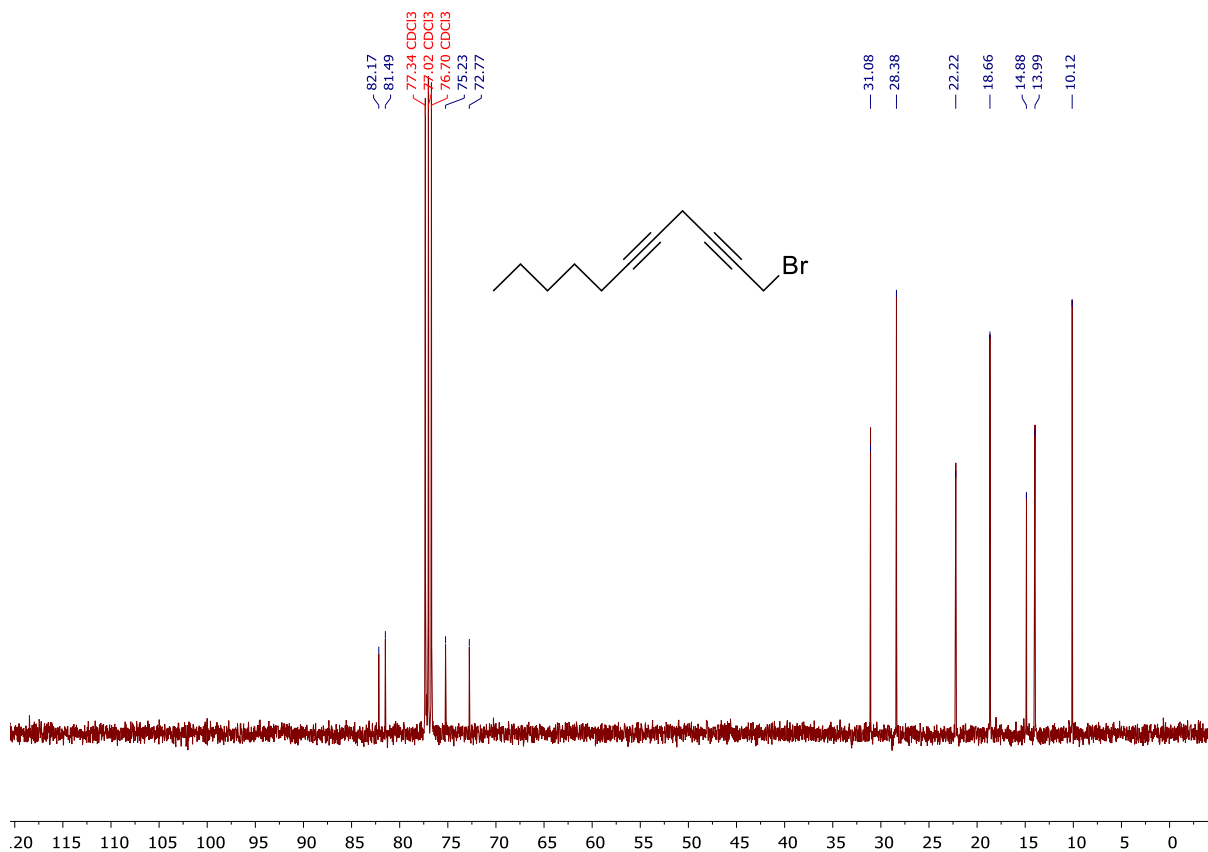

$^1\text{H}$ - $^1\text{H}$  COSY spectrum of compound **20**

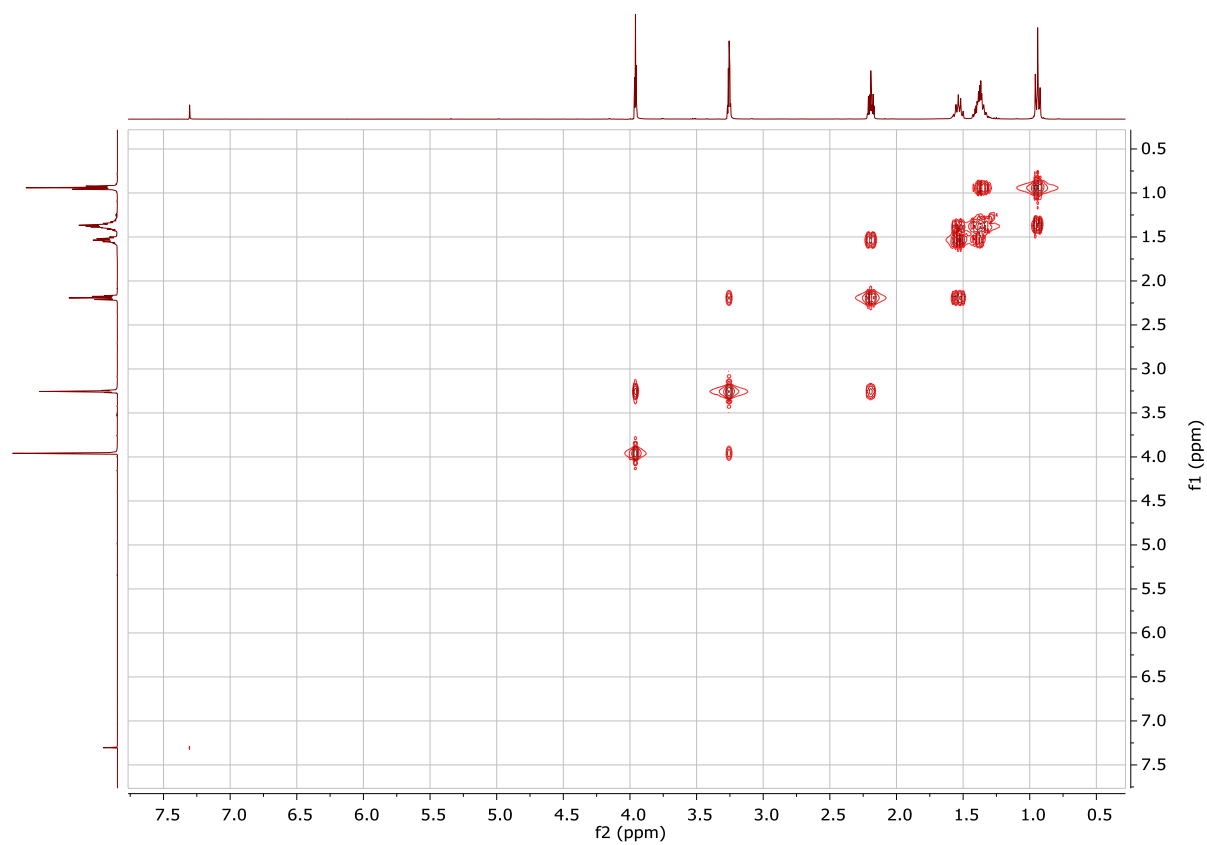

$^{13}\text{C}$ - $^1\text{H}$  HSQC spectrum of compound **20**

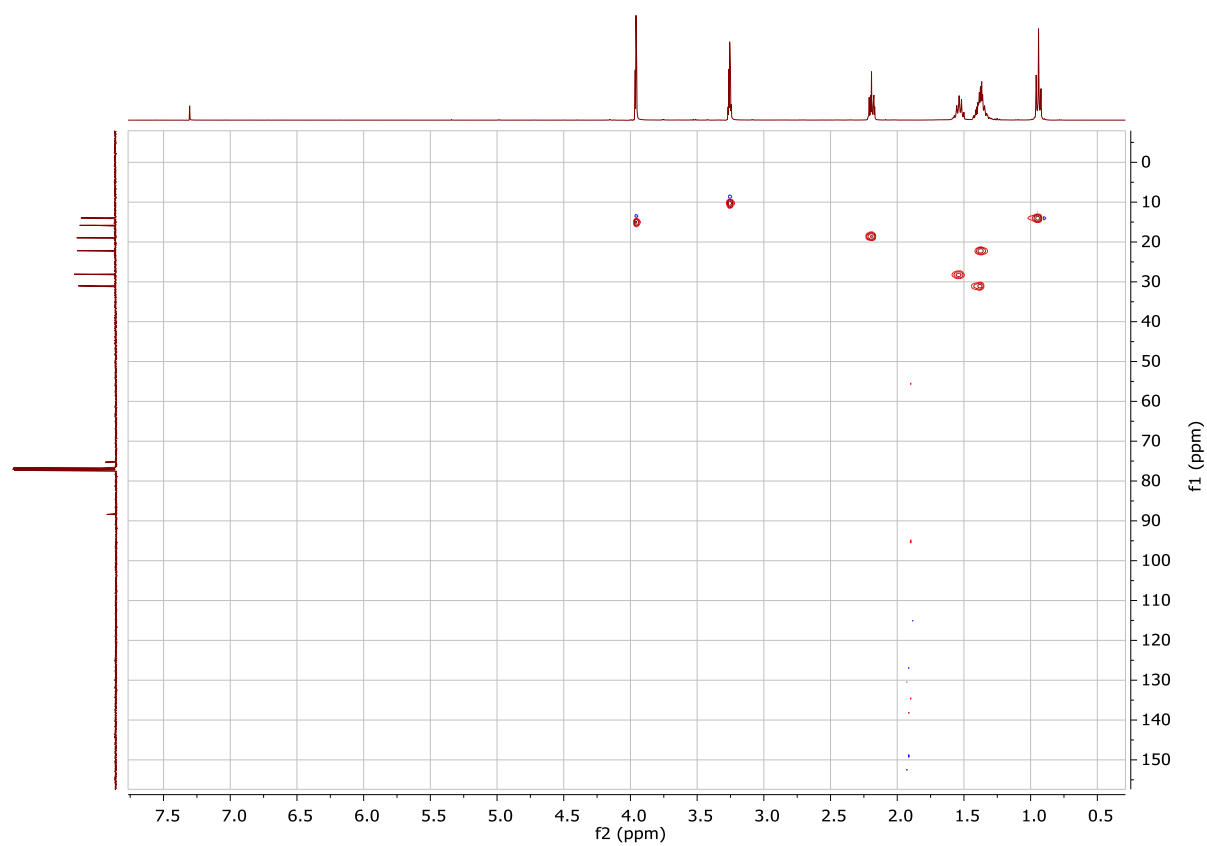

$^1\text{H}$  NMR (400 MHz,  $\text{CDCl}_3$ ) of compound **21**

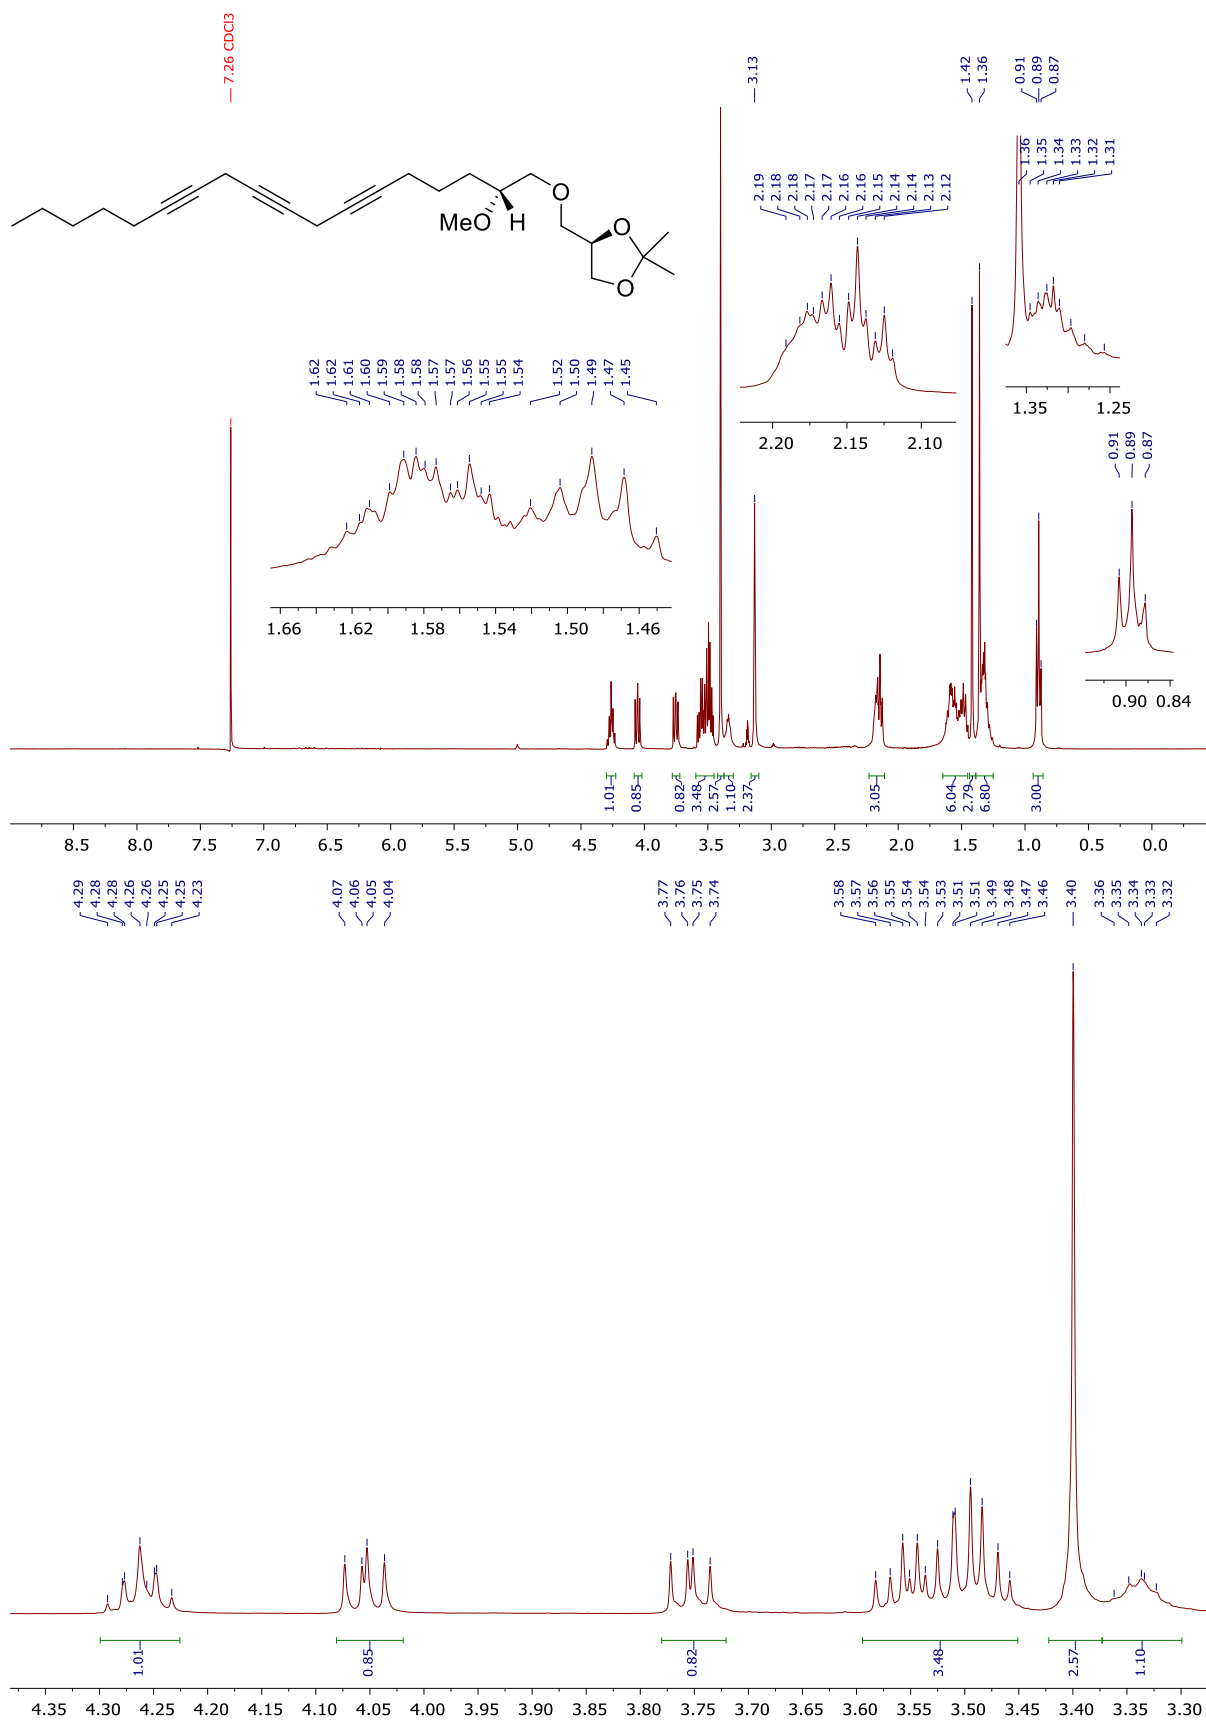

$^{13}\text{C}\{^1\text{H}\}$  NMR (101 MHz,  $\text{CDCl}_3$ ) of compound **21**

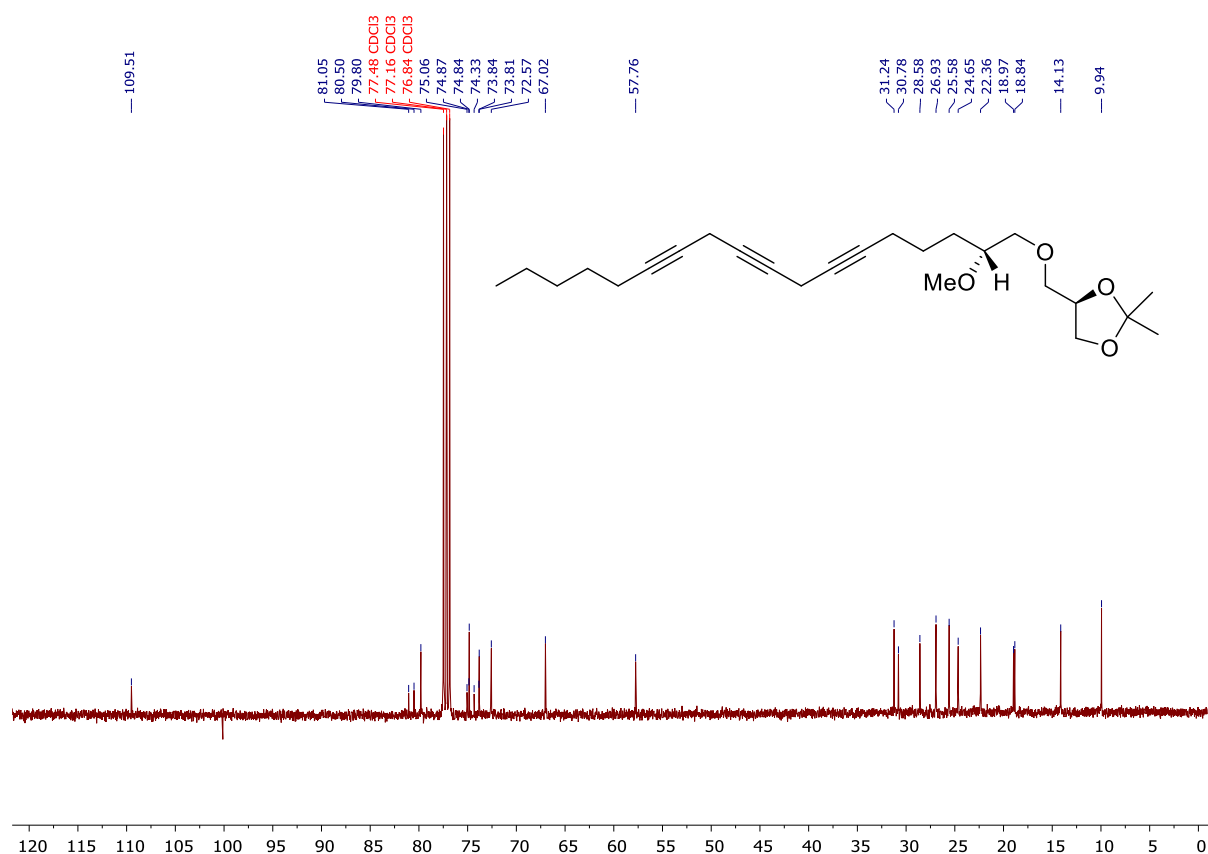

$^1\text{H}$ - $^1\text{H}$  COSY spectrum of compound **21**

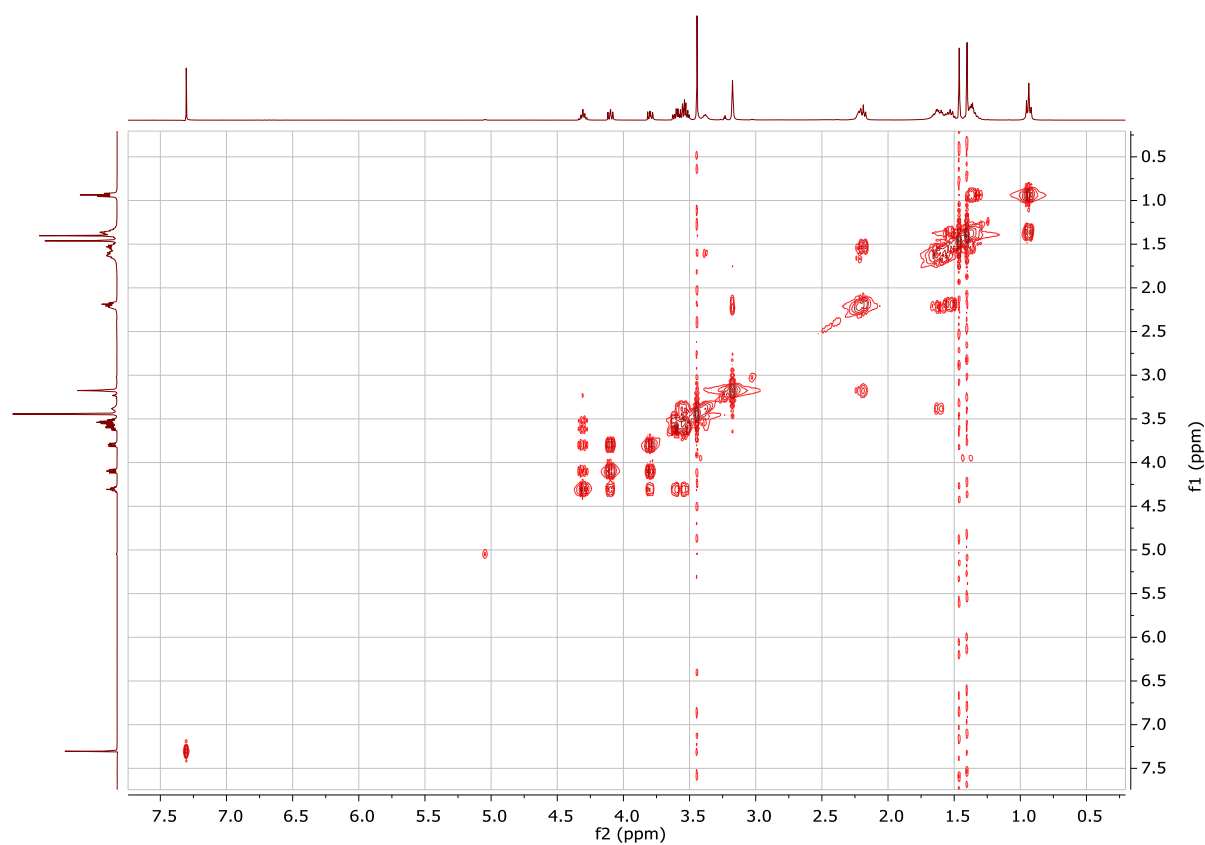

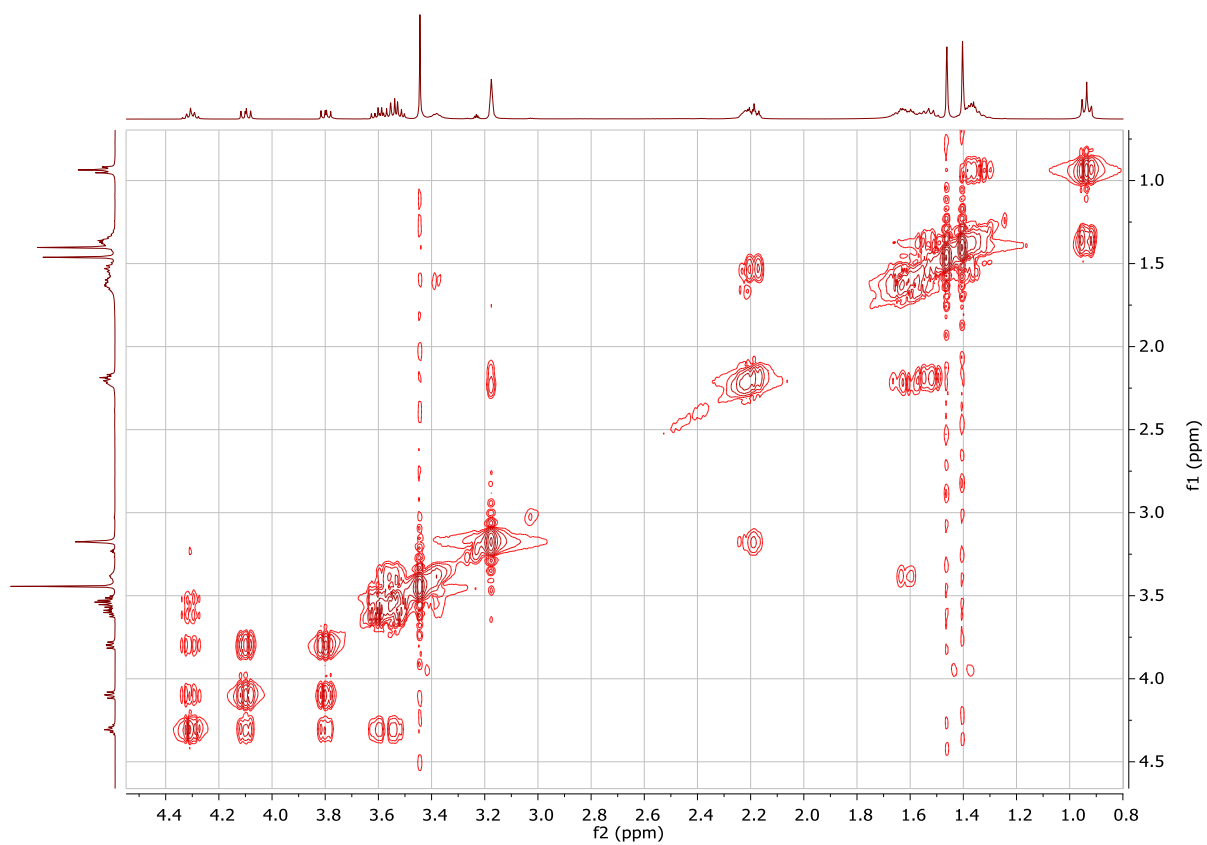

$^{13}\text{C}$ - $^1\text{H}$  HSQC spectrum of compound **21**

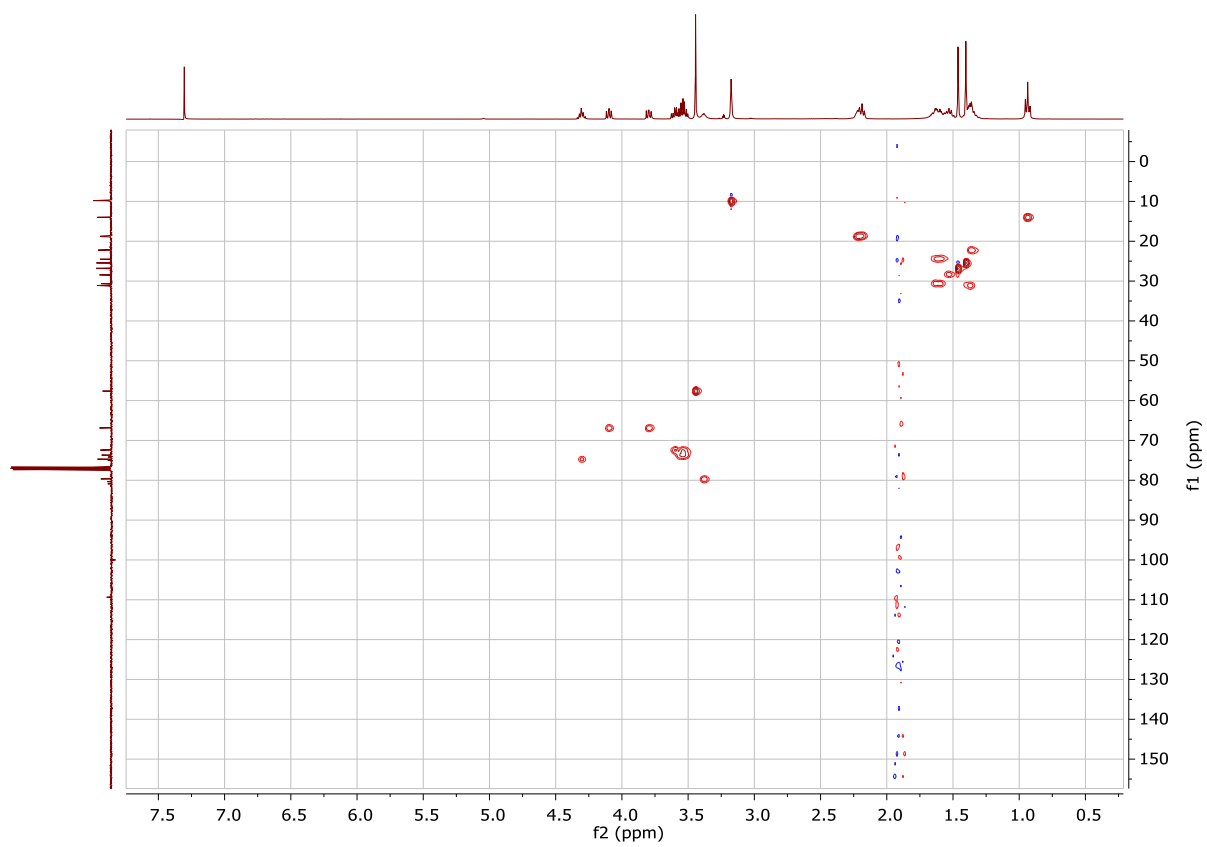

$^1\text{H}$  NMR (400 MHz,  $\text{CDCl}_3$ ) of compound **22**

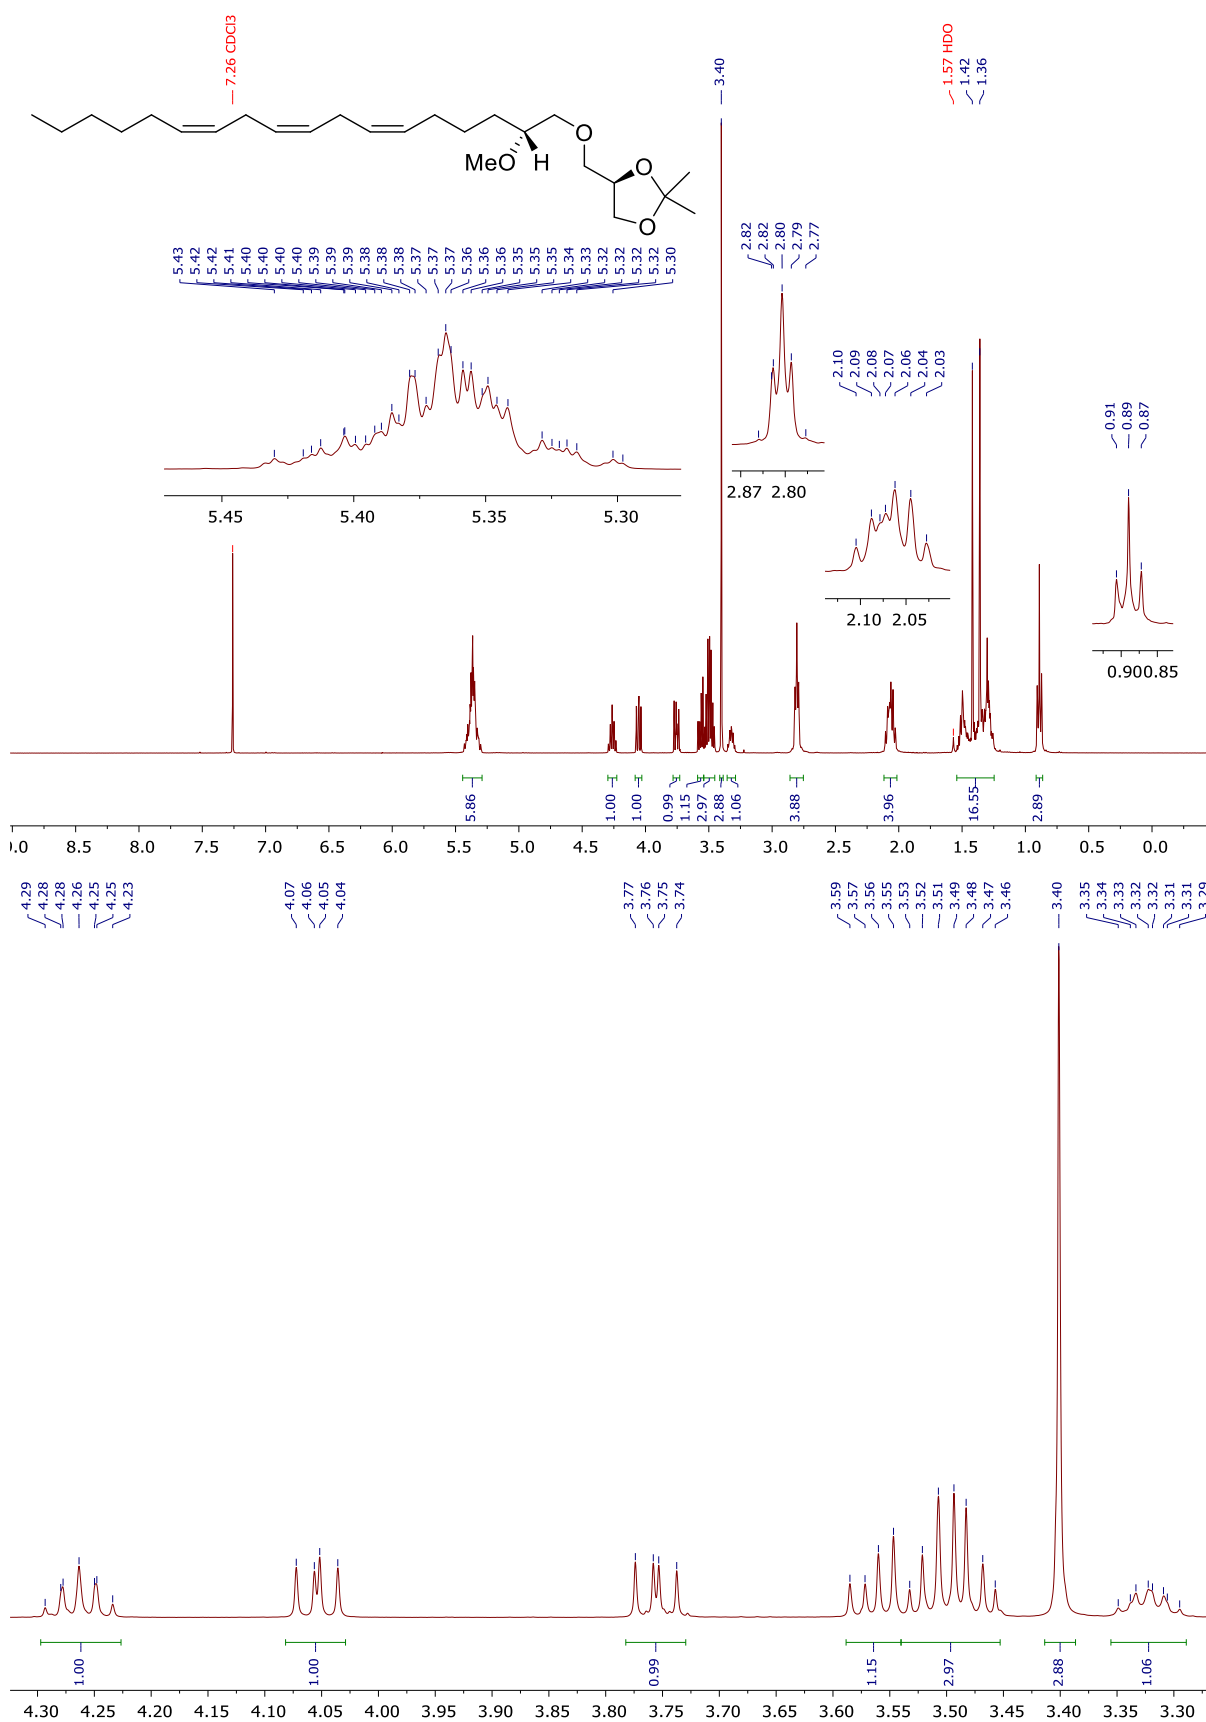

$^{13}\text{C}\{\text{H}\}$  NMR (101 MHz,  $\text{CDCl}_3$ ) of compound **22**

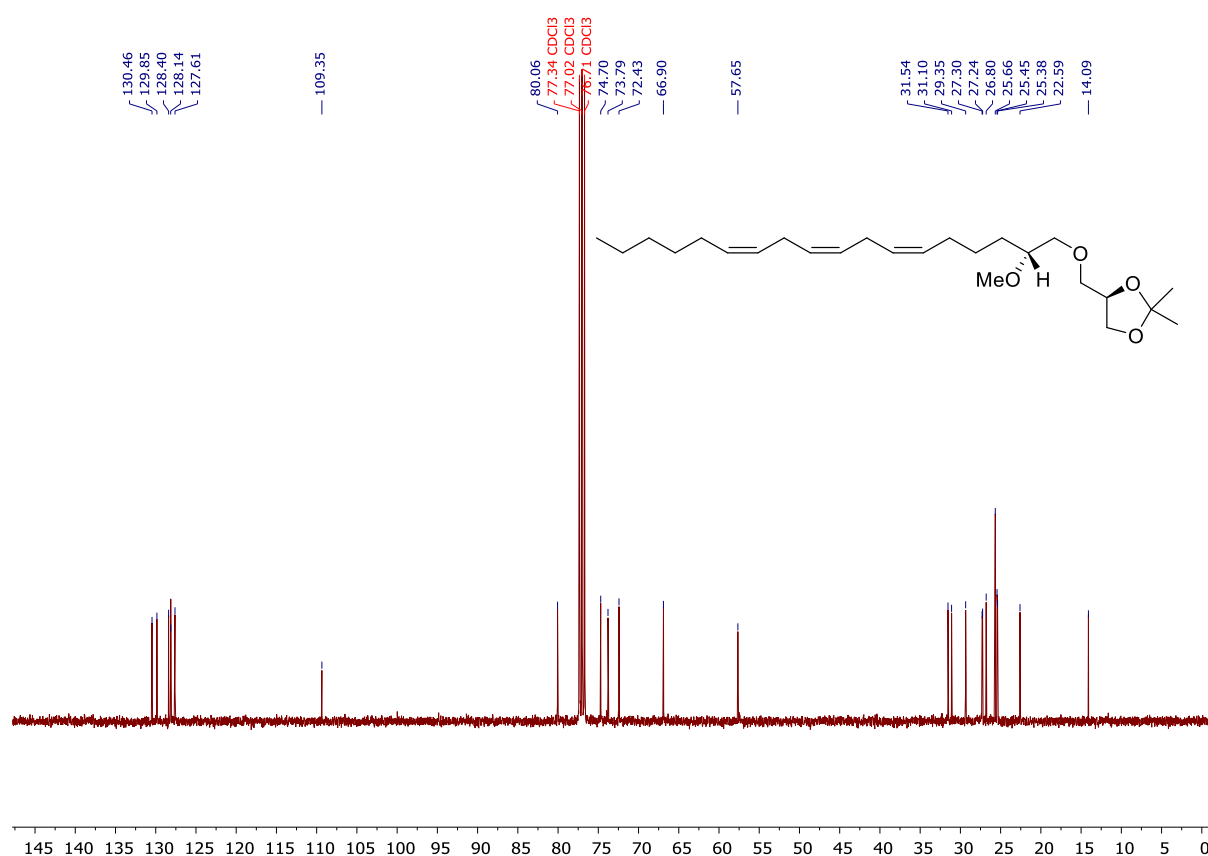

$^1\text{H}$ - $^1\text{H}$  COSY spectrum of compound **22**

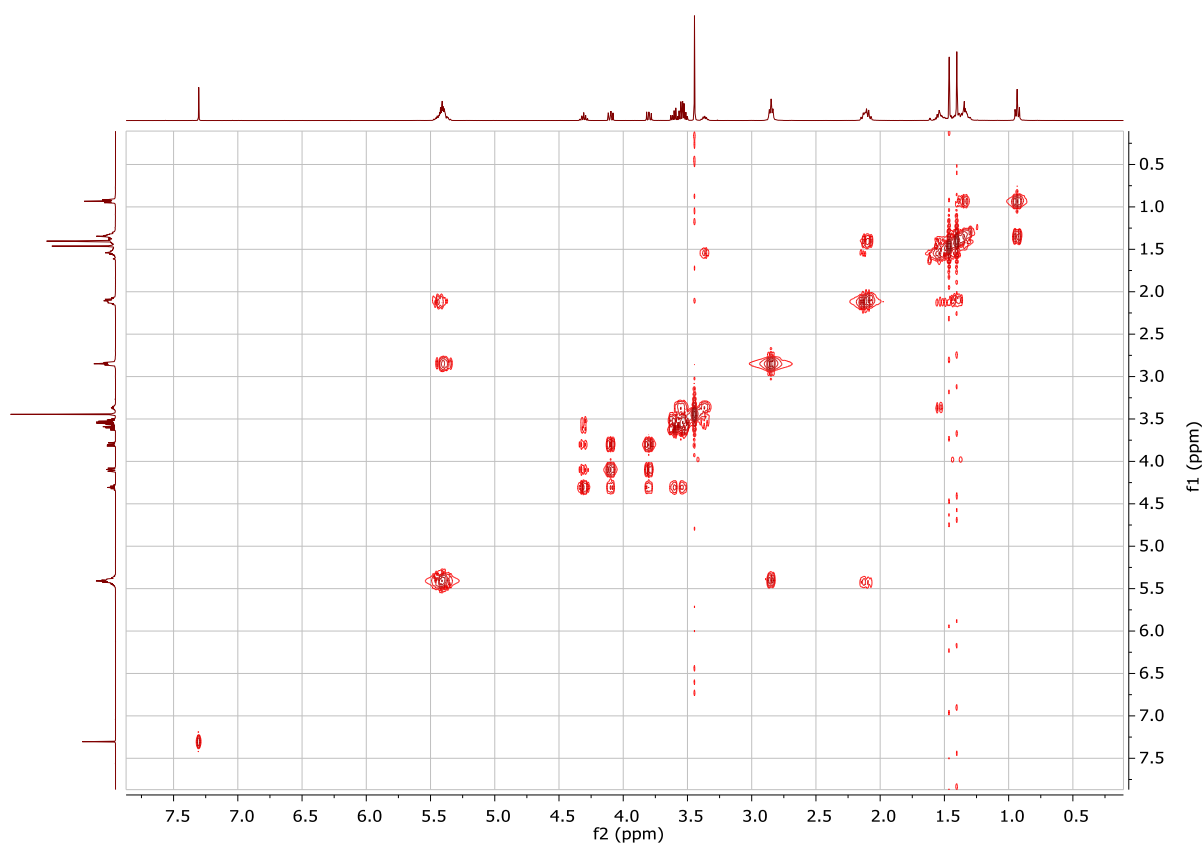

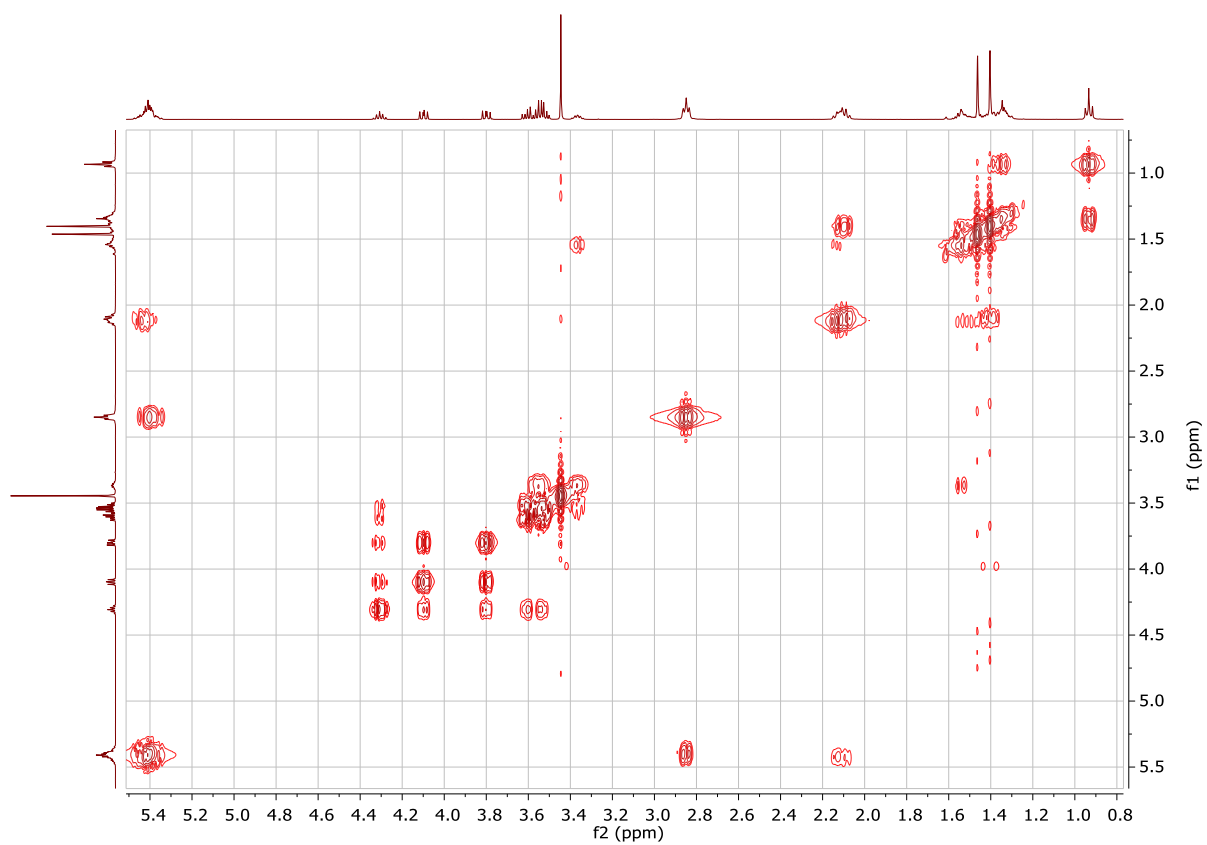

$^{13}\text{C}$ - $^1\text{H}$  HSQC spectrum of compound **22**

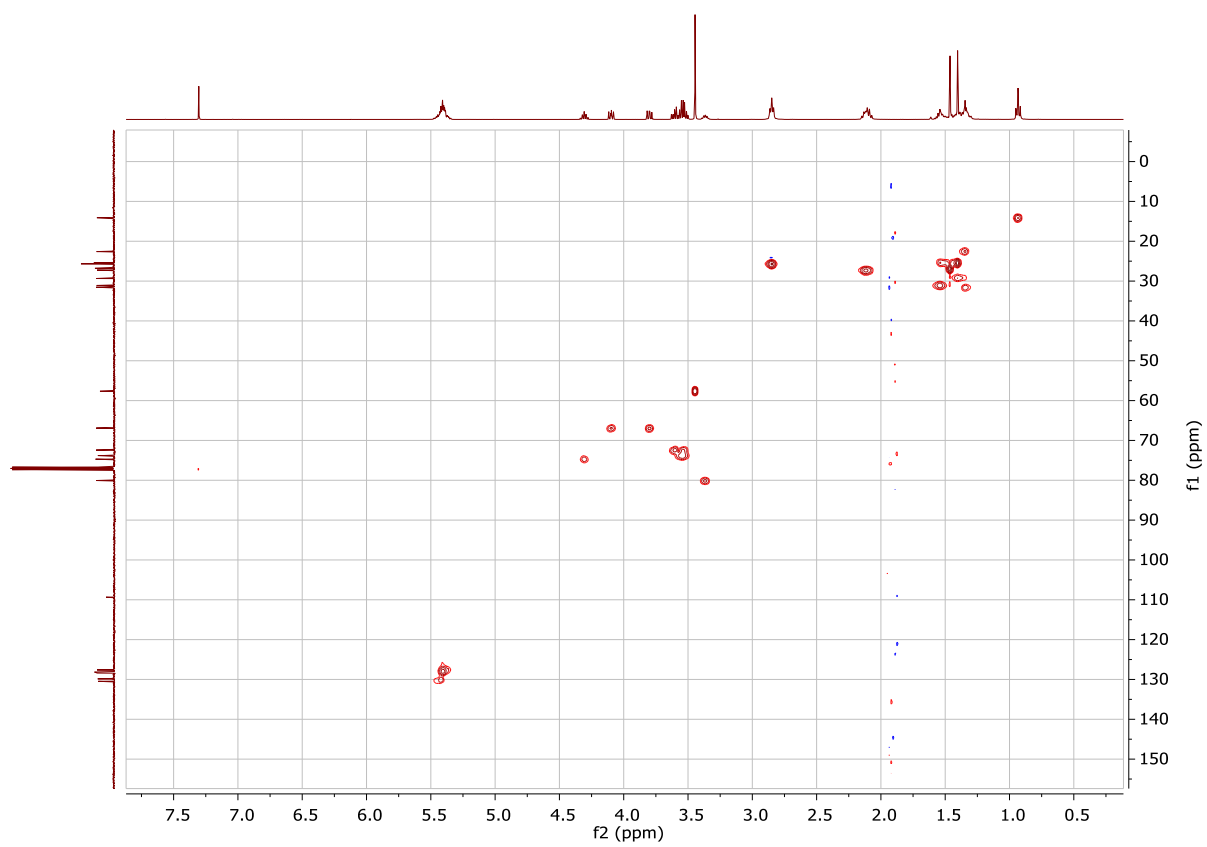

$^1\text{H}$  NMR (400 MHz,  $\text{CDCl}_3$ ) of MEL **6**

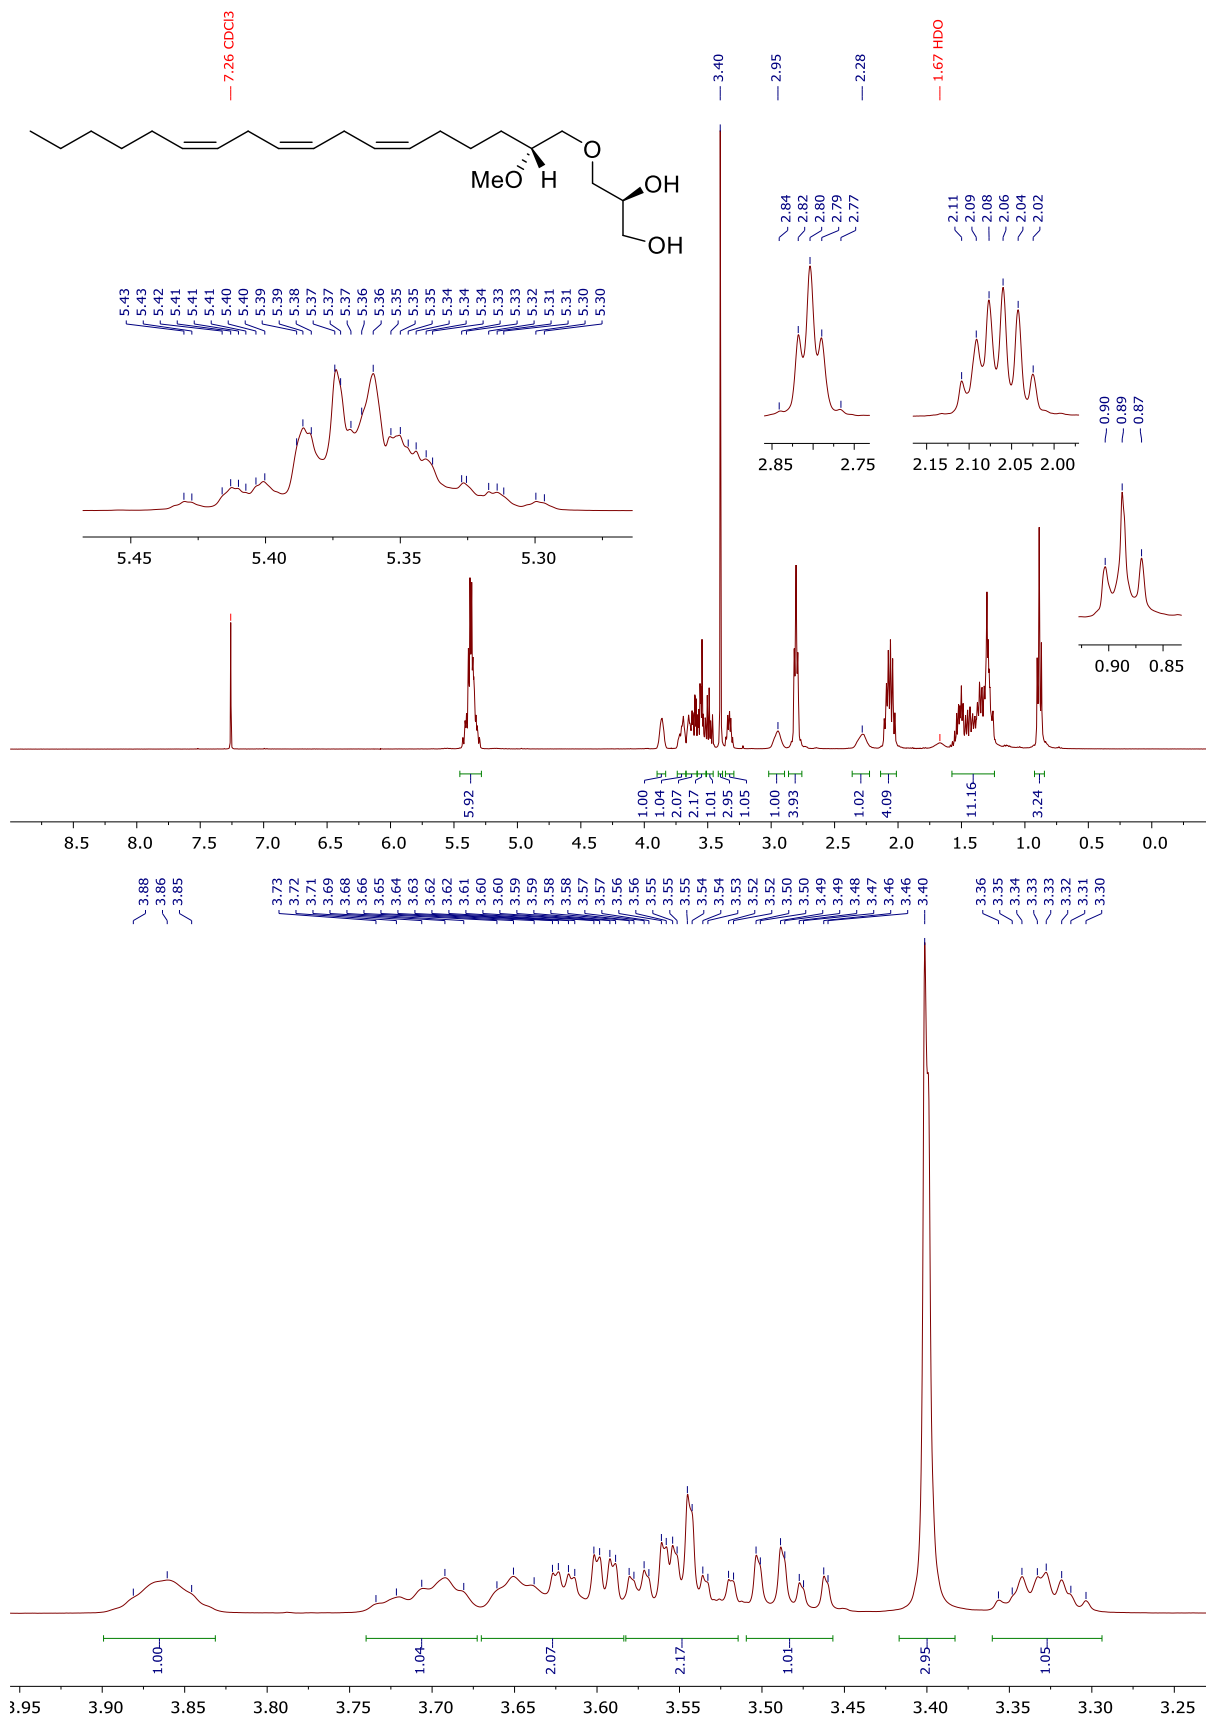

$^{13}\text{C}\{^1\text{H}\}$  NMR (101 MHz,  $\text{CDCl}_3$ ) of MEL 6

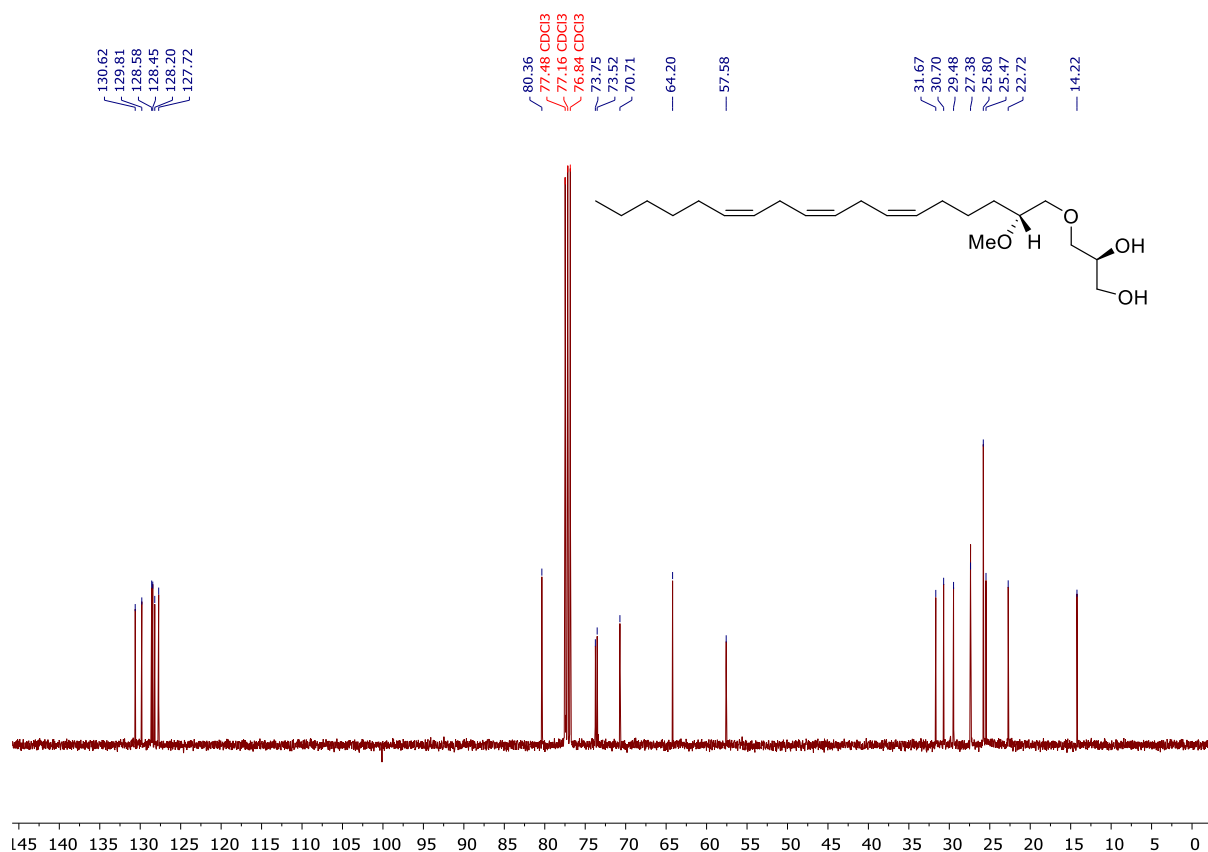

$^1\text{H}$ - $^1\text{H}$  COSY spectrum of MEL 6

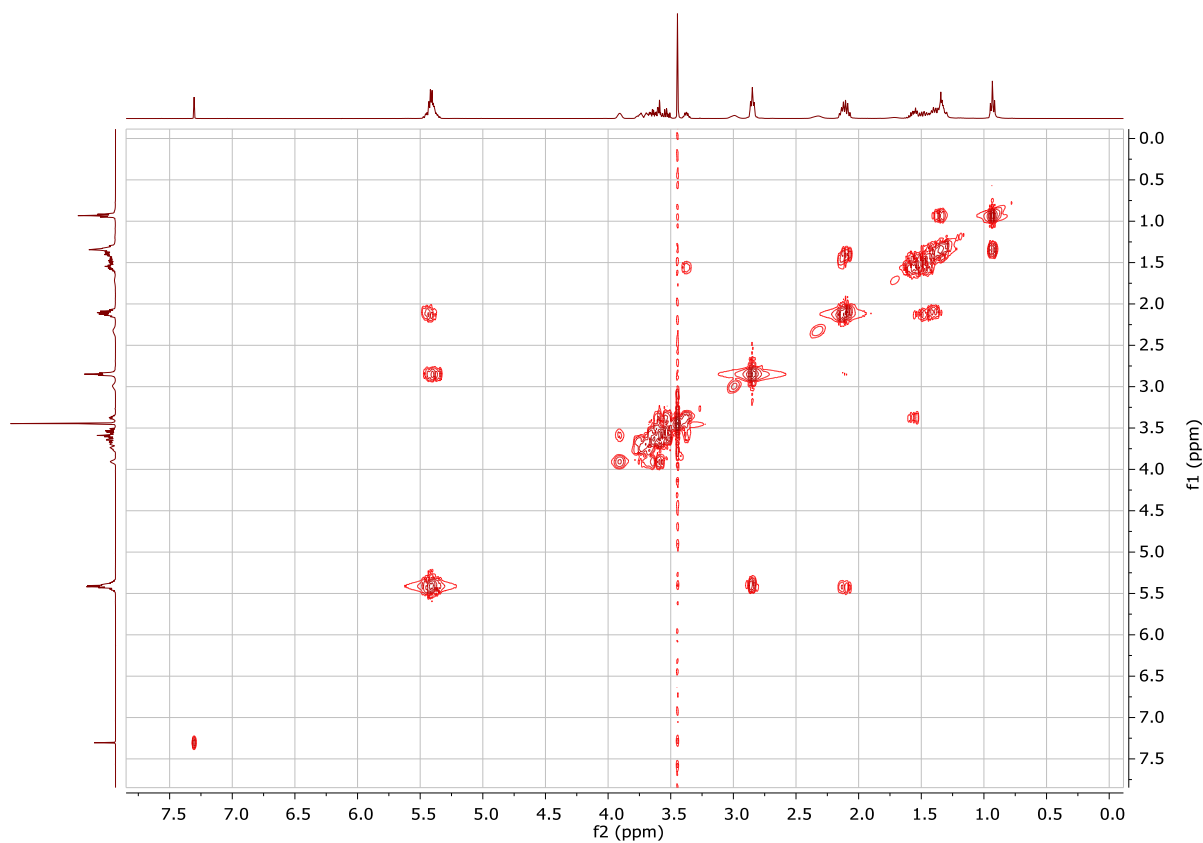

$^{13}\text{C}$ - $^1\text{H}$  HSQC spectrum of MEL 6

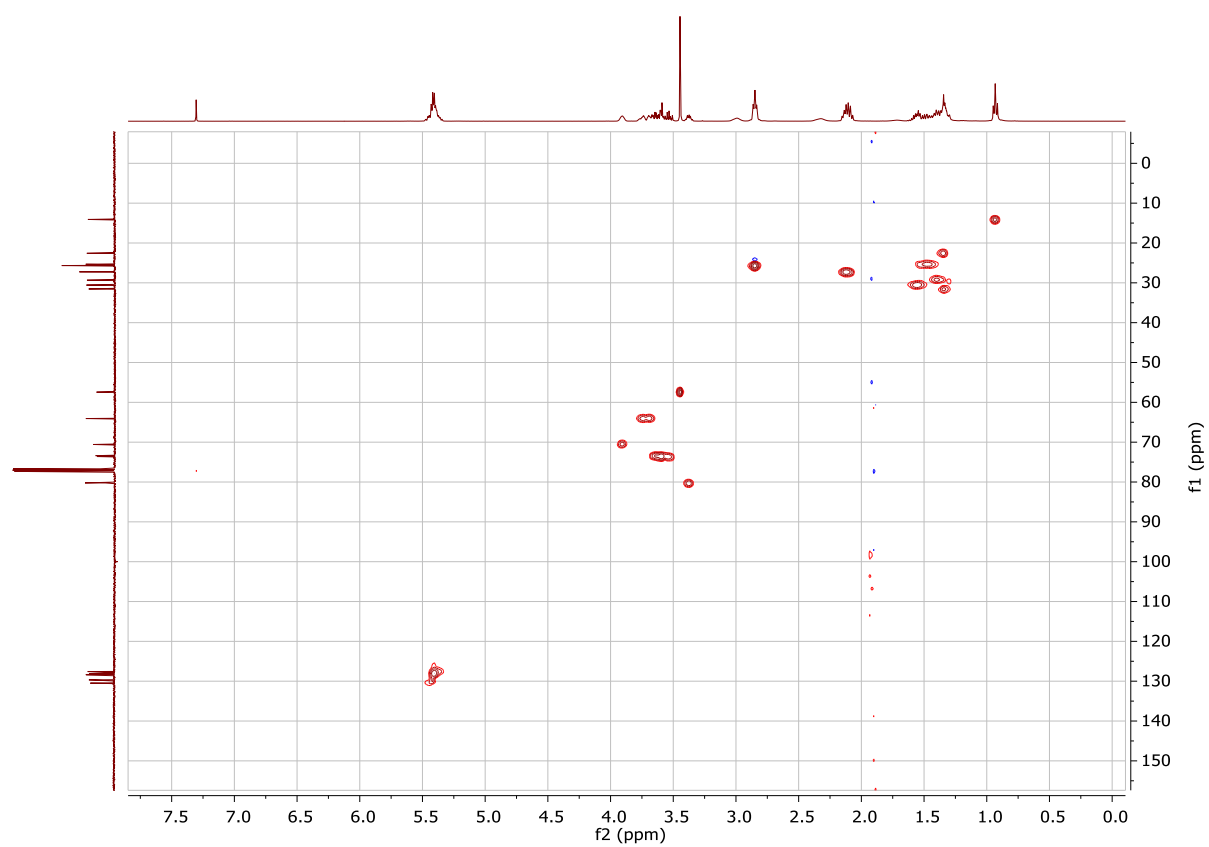

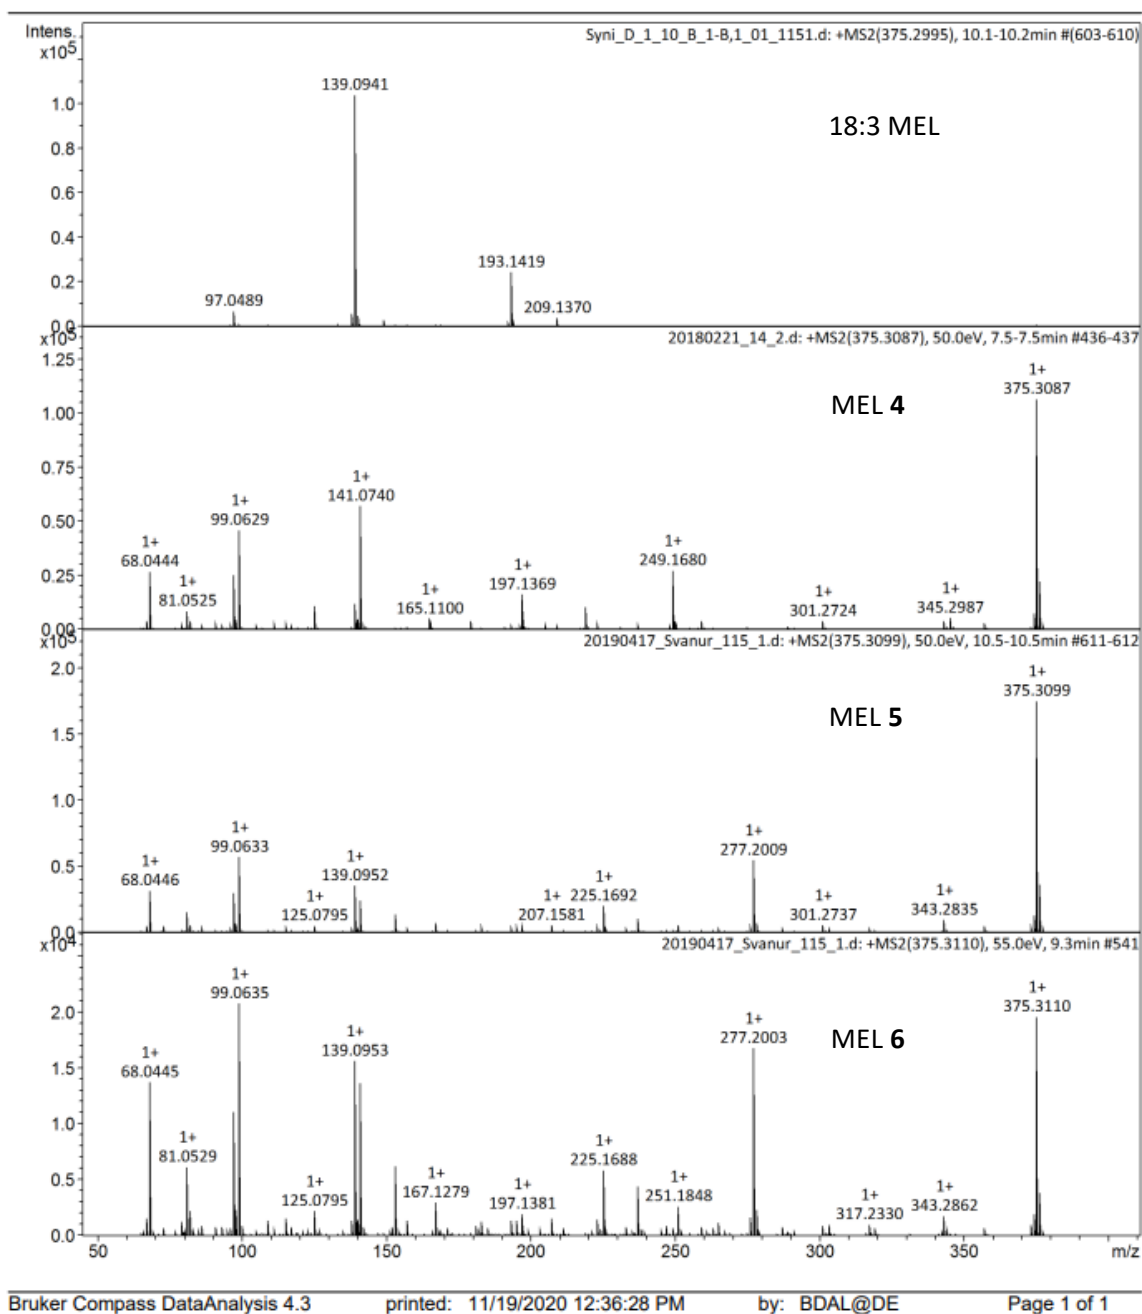

**Figure S1.** Comparison of the  $[M+Li]^+$  MS/MS fragmentation spectra of the synthesized MELs **4**, **5**, **6** and the 18:3 MEL found in the shark and dogfish liver oil sample (top).
